# Supplementary material for: The Molecular Timeline of a Reviving Bacterial Spore
Source: PubMed Central journal article supplement — Mol Cell. 2015 Feb 19;57(4):695–707. doi: 10.1016/j.molcel.2014.12.019 (PMC4339302; doi:10.1016/j.molcel.2014.12.019), 2015-02-19
Supplement: mmc4.pdf [file mmc4.pdf]

## The Molecular Timeline of a Reviving Bacterial Spore

## Graphical Abstract

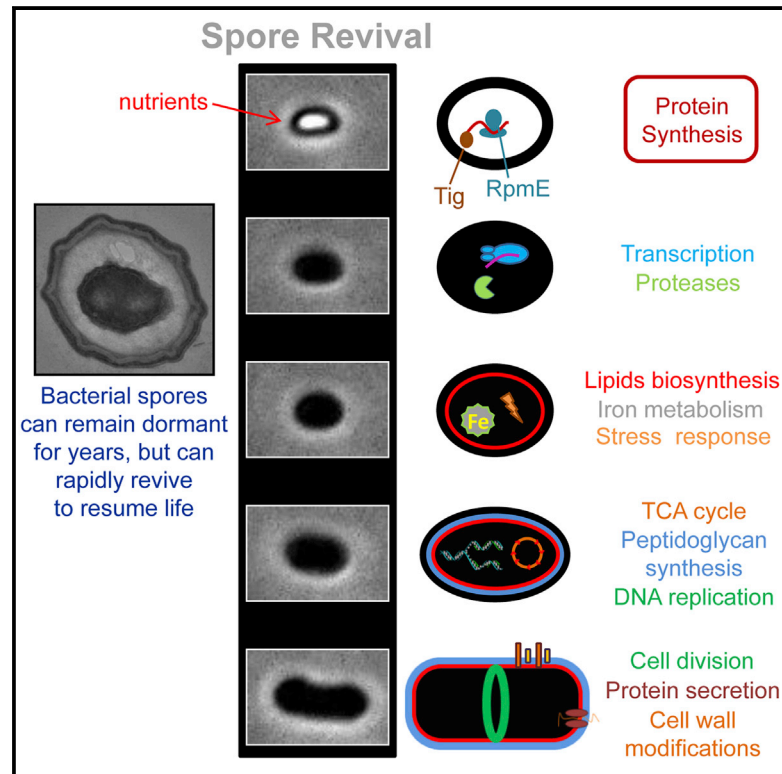

## Authors

Lior Sinai, Alex Rosenberg, ...,  
Einat Segev, Sigal Ben-Yehuda

## Correspondence

sigalb@ekmd.huji.ac.il

## In Brief

Sinai et al. describe the spatial and temporal molecular events occurring throughout the remarkable awakening process of a dormant bacterial spore and show that, in contrast to current knowledge, protein synthesis takes place during the earliest revival event, termed germination, and is required for its execution.

## Highlights

- We reveal the identity of the newly synthesized proteins throughout spore revival
- We define the timeline of molecular events occurring during spore revival
- Protein synthesis occurs during germination and is essential for its execution
- RpmE and Tig are required for protein synthesis during germination

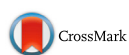

# The Molecular Timeline of a Reviving Bacterial Spore

Lior Sinai,<sup>1</sup> Alex Rosenberg,<sup>1</sup> Yoav Smith,<sup>2</sup> Einat Segev,<sup>1,3</sup> and Sigal Ben-Yehuda<sup>1,\*</sup>

<sup>1</sup>Department of Microbiology and Molecular Genetics, Institute for Medical Research Israel-Canada, The Hebrew University-Hadassah Medical School, POB 12272, The Hebrew University of Jerusalem, 91120 Jerusalem, Israel

<sup>2</sup>Genomic Data Analysis Unit, The Hebrew University-Hadassah Medical School, The Hebrew University of Jerusalem, 91120 Jerusalem, Israel

<sup>3</sup>Present address: Department of Microbiology and Immunobiology, Harvard Medical School, Boston, MA 02115, USA

\*Correspondence: [sigalb@ekmd.huji.ac.il](mailto:sigalb@ekmd.huji.ac.il)

<http://dx.doi.org/10.1016/j.molcel.2014.12.019>

This is an open access article under the CC BY-NC-ND license (<http://creativecommons.org/licenses/by-nc-nd/4.0/>).

## SUMMARY

The bacterial spore can rapidly convert from a dormant to a fully active cell. Here we study this remarkable cellular transition in *Bacillus subtilis* and reveal the identity of the newly synthesized proteins throughout spore revival. Our analysis uncovers a highly ordered developmental program that correlates with the spore morphological changes and reveals the spatial and temporal molecular events fundamental to reconstruct a cell. As opposed to current knowledge, we found that translation takes place during the earliest revival event, termed germination, a process hitherto considered to occur without the need for any macromolecule synthesis. Furthermore, we demonstrate that translation is required for execution of germination and relies on the bona fide translational factors RpmE and Tig. Our study sheds light on the spore revival process and on the vital building blocks underlying cellular awakening, thereby paving the way for designing new antimicrobial agents to eradicate spore-forming pathogens.

## INTRODUCTION

The Gram-positive bacterium *Bacillus subtilis* (*B. subtilis*) belongs to a unique type of bacteria, capable of altering between modes of growth and sporulation. The process of sporulation is induced by nutrient deprivation and is initiated by the formation of an asymmetrically positioned septum. This polar septum divides the cell into a small forespore compartment, which ultimately becomes a spore, and a larger mother cell, which nurtures the developing spore. Subsequently, the forespore is engulfed by the mother cell, and a thick layer of peptidoglycan, termed the cortex, as well as inner and outer shells of proteinaceous coats, is deposited around the spore (Stragier and Losick, 1996). These protective layers confer unique mechanical properties, acting as a shield between the spore and its surroundings, enabling it to face extremes of heat, radiation, and chemical assault for long

periods of time. Consequently, spore-forming bacteria, including dangerous pathogens such as *Clostridium difficile* (*C. difficile*) and *Bacillus anthracis* (*B. anthracis*), are highly resistant to antibacterial treatments and difficult to eradicate (Driks, 2002; Setlow, 2003). Sporulation culminates when the mother-cell lyses and the mature spore is discharged. The common notion is that from this moment on the spore is dormant and metabolically inert (Stragier and Losick, 1996). However, we have recently shown that entering dormancy lasts a few days, during which the spore RNA content is actively modified, changing according to spore age and temperature of incubation (Segev et al., 2012).

Once nutrients become available, dormancy ceases, and the spore rapidly resumes a vegetative life form (Setlow, 2003; Stragier and Losick, 1996). This revival process is classically divided into two major consecutive phases: (1) germination, during which the spore undergoes rehydration, release of dipicolinic acid (DPA), cortex hydrolysis, and coat disassembly (this phase is accompanied by transition from a phase-bright spore to a phase-dark cell, as manifested by light microscopy) and (2) outgrowth, in which the spore activates the synthesis of macromolecules to become a vegetative cell and emerges from the disintegrating spore shells (Moir, 2006; Santo and Doi, 1974; Setlow, 2003). Previously, we identified an intermediate phase, designated the “ripening period,” taking place early during outgrowth prior to cell elongation, in which no morphological change is evident. We found that this period is dedicated to molecular reorganization and demonstrated that it varies in length according to the initial molecular resources contained within the spore (Segev et al., 2013). We refer here to the entire process of resuming growth, which includes germination, ripening, and outgrowth, as “spore revival.”

Spore germination is triggered upon exposure to an array of molecules, including amino acids, sugars, and cell wall muropeptides that bind to receptors in the inner spore membrane. These ligand-receptor interactions activate downstream signaling events, directing the spore to revive (Moir, 2006; Setlow, 2003; Shah et al., 2008). In *B. subtilis*, the GerA receptor induces germination in response to L-alanine, while the GerB and GerK receptors collaborate to trigger germination in response to a mixture of asparagine, glucose, fructose, and potassium ions (AGFK) (Setlow, 2003). Currently held views consider germination to occur without the need for any macromolecule synthesis

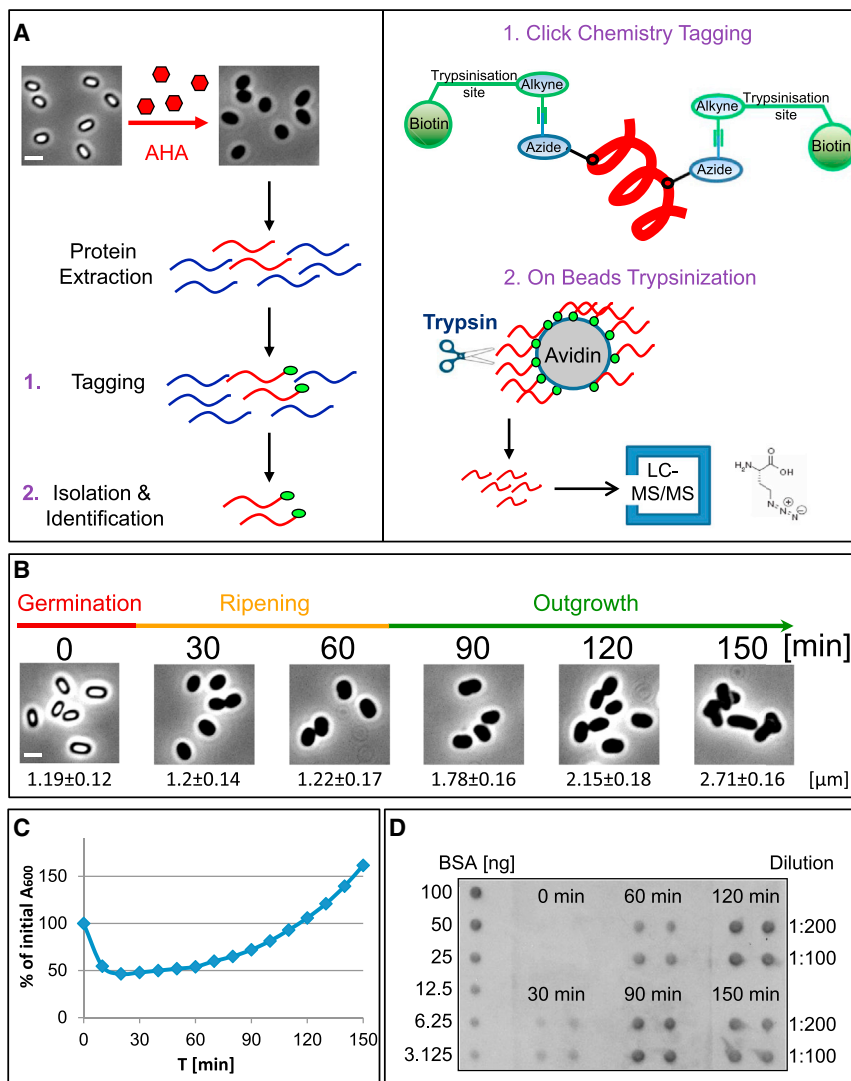

**Figure 1. Identifying the Newly Synthesized Proteins in the Course of Spore Revival**

(A) Schematic description of the BONCAT strategy (Dieterich et al., 2007) for labeling, detection, and identification of the newly synthesized proteins tagged with AHA during spore revival. The general flow of the procedure (left) and detailed illustration of specific steps (right) are shown. Spores of LS5 ( $\Delta metE$ ) strain are incubated in revival medium containing AHA (red hexagons), and the newly synthesized proteins (red curved lines) are separated from the existing spore proteins (blue curved lines). Spore proteins are extracted and tagged with TAP tag (green circles) using click chemistry (1, right). Next, newly produced proteins are isolated using avidin beads and identified by mass spectrometry (2, right). Scale bar represents 1  $\mu\text{m}$ . (B) Spores of LS5 ( $\Delta metE$ ) strain were incubated in revival medium in which methionine was replaced by AHA. The sequence of events during revival is shown as captured by phase contrast images: germination is visualized as the loss of spore brightness (red line), the ripening period in which no morphological change is evident (orange line), and outgrowth is characterized by increasing cell length (green line). The average length of the reviving spores is presented below. Scale bar represents 1  $\mu\text{m}$ .

(C) Spores of LS5 ( $\Delta metE$ ) strain were incubated in revival medium and optical density ( $OD_{600}$ ) was measured at the indicated time points. Data are presented as a fraction of the initial  $OD_{600}$  of the phase-bright spores. Decreasing  $OD_{600}$  signifies spore germination, and increasing  $OD_{600}$  indicates spore outgrowth (Moir and Smith, 1990).

(D) Dot blot analysis of protein samples (in duplicates) collected throughout revival of LS5 ( $\Delta metE$ ) spores at the indicated time points. Samples were diluted (1:100 and 1:200) and spotted on a membrane that was subsequently probed with anti-biotin antibodies. The obtained signal was compared with known amounts of biotinylated BSA.

(Moir, 2006; Setlow, 2003, 2013; Steinberg et al., 1965; Vinter, 1970), while the subsequent stages are characterized by massive production of RNA and proteins. A detailed investigation of the reviving spore proteome, utilizing 2D gel analysis, revealed the process to be highly ordered, with specific classes of proteins produced in a temporal manner (Hecker et al., 1984; Torriani and Levinthal, 1967); however, the identity of these proteins was not determined. A more recent study monitoring the expression profile of mRNA throughout spore revival corroborated the existence of a complex developmental program, involving the temporal expression of at least 30% of the *B. subtilis* genome (Keijser et al., 2007). Here, we present a comprehensive time resolution analysis describing the identity of proteins synthesized in the course of spore revival. Through our investigation, we uncover how a dormant cell restores life. Furthermore, we provide evidence that, in contrast to current thinking, protein synthesis occurs during germination and is essential for its execution.

## RESULTS

### Determining the Temporal Landscape of the Newly Synthesized Proteins during Spore Revival

The remarkable transition from a dormant spore to a fully active cell offers a unique opportunity to follow the molecular events required to build a cell. To explore this transition, we attempted to determine the proteomic landscape of a reviving spore throughout germination, ripening, and outgrowth. To differentiate the newly synthesized proteins during revival from the pre-existing spore protein pool, we employed the BONCAT (BioOrthogonal Non-Canonical Amino-acid Tagging) protein tagging technique (Figure 1A; see Experimental Procedures) (Dieterich et al., 2007). BONCAT allows the specific labeling and identification of newly translated proteins due to incorporation of an azide-bearing artificial amino acid termed azidohomoalanine (AHA), which is a substitute for methionine.

Since *B. subtilis* is capable of synthesizing methionine, we constructed an auxotrophic strain to enhance AHA uptake by deleting the *metE* gene. Cells were induced to sporulate in the presence of methionine, and the resulting spores were purified. Spores were then subjected to revival in minimal medium containing the germination triggering molecules AGFK and L-alanine, supplemented with amino acids excluding methionine, which was replaced by AHA. The auxotrophic *B. subtilis* spores revived normally in the presence of AHA, likely due to sufficient amounts of endogenous methionine contained within spores (Setlow, 1988). As can be seen, germination, determined as the transition from a phase-bright spore to a phase-dark cell (Figure 1B), was accompanied by a drop in OD<sub>600</sub> and took place from 0 to 15 min (Figure 1C). The subsequent ripening period, in which no morphological changes were evident, extended from 15 to 60 min (Figures 1B and 1C), and finally outgrowth, characterized by increase in cell length and OD<sub>600</sub>, occurred between 60 and 150 min (Figures 1B and 1C). Proteins were extracted from dormant spores (t = 0) and at 30 min intervals during revival until the first vegetative division took place at t = 150 min (Figure 1B). The extracted protein samples were then incubated with an alkyne-bearing biotin-Flag tag (TAP tag) to covalently label the newly synthesized proteins harboring AHA (Figure 1A). The amount of tagged proteins was estimated using dot blot analysis with antibody against biotin. Synthesis of labeled proteins was readily detected at t = 30 min, increasing gradually with time (Figure 1D). To enrich for newly synthesized proteins, samples were incubated with NeutrAvidin beads, and the captured proteins were cleaved with trypsin and identified by mass spectrometry (Figure 1A). At least two valid peptides per locus or one peptide containing an AHA-derived modification served as the minimal requirement to classify a detected protein as translated during the AHA-labeling step (Dieterich et al., 2007).

Utilizing this approach, a total of 653 proteins were identified as translated during the transition from dormant state to vegetative growth (Table S1 available online). Notably, 217 newly synthesized proteins were detected as early as 30 min into revival (Table S1). The synthesis of these proteins was largely dependent on de novo transcription, since when spores were subjected to revival in the presence of the two transcriptional inhibitors rifampicin and actinomycin D, only 12 proteins were detected at the same time point (Table S2). Additional 158 newly identified proteins were monitored at t = 60 min, when spores were at the ripening phase. At t = 90 min, when outgrowth was evident, 176 new proteins were detected. Finally, about 50 proteins were added to the pool at each subsequent time point during the transition to vegetative growth (Table S1).

To analyze the awakening pattern of molecular processes upon revival, we categorized the identified proteins into distinct groups according to their molecular function, using various *B. subtilis* genomic databases (Subtiwiki, GenoList, Uniport) (Table S1). A global view of this transition is presented in Figure 2. The activated cellular processes display different patterns, with several having all protein components detected at the first time point (e.g., glycolysis, ATP synthesis), while others exhibit a gradual awakening pattern (e.g., utilization of amino acids, rRNA and tRNA processing). Further, some pathways, in which all components were initially dormant, displayed synchronized

synthesis at a given time point (e.g., fatty acid and teichoic acid biosyntheses). To corroborate our BONCAT-based data, representative proteins from different categories were fused to GFP, and their production during revival was followed. Indeed, fluorescence from GFP precisely coincided with the time of protein detection by BONCAT (Figure 3).

### The Early Spore Revival Proteome

During the first 30 min of the revival process, the spore undergoes germination (after 15 min, approximately 80% of the spores complete germination) and enters the ripening period (Figures 1B and 1C). During these initial stages, 217 proteins were detected, which corresponds to 33% of the spore revival proteome, demonstrating rapid acquisition of metabolism. Accordingly, the core components of the transcriptional and translational machineries were produced along with a group of chaperones required for proper protein folding. Energy generation machineries, including all ATP synthesis, glycolysis, and pyruvate dehydrogenase (PDH) components, were readily detected at this time, providing fuel to the ongoing revival process (Figures 2 and 3; Table S1).

Notably, the metabolic pathway components required for malate utilization, including all four malic enzymes (MaeA, MalS, MleA, and YtsJ) that convert malate into pyruvate through oxidative decarboxylation (Meyer and Stülke, 2013), were produced at this early stage (Figures 2 and 3; Table S1). Malate, which is a preferred carbon source for *B. subtilis* (Meyer and Stülke, 2013), was not supplemented into the medium, implying that the spore stores malate as a key carbon source to energize revival. Consistent with this view, spores compared with vegetative cells were found to harbor large amounts of malate (Figure S1A). Furthermore, a strain deleted of all four genes encoding malic enzymes showed no detectable growth defect but displayed an extended ripening period in comparison to reviving WT spores (Figures S1B–S1D). Additionally, spores of the quadro mutant contained malate levels similar to those of WT spores (Figure S1A), indicating that the observed ripening defect is due to deficiency in malate utilization.

### The Progression of the Ripening Period

No morphological change was evident 60 min into spore revival, indicating that the spore was still at the ripening period, although a substantial group of 158 additional proteins was produced at this time point (Figure 2; Table S1). The pentose phosphate pathway was among the most prominent fully activated processes. This pathway is required to generate pentoses and NADPH; the former is essential for nucleotide biogenesis, whereas the latter is required for fatty acid biosynthesis (Zamboni et al., 2004). In line with this finding, processes related to lipid biosynthesis were fully activated after 60 min, including fatty acid and phospholipid formation and production of malonyl-CoA, indicating that membrane construction was initiated (Figure 2; Table S1).

A manifested activation was also observed for the pyrimidine biosynthesis pathway, in which all 14 proteins involved were detected at t = 60 min. Notably, most of the purine biosynthesis proteins were already detected 30 min into revival (Figure 2; Table S1). These observations are consistent with the premise that

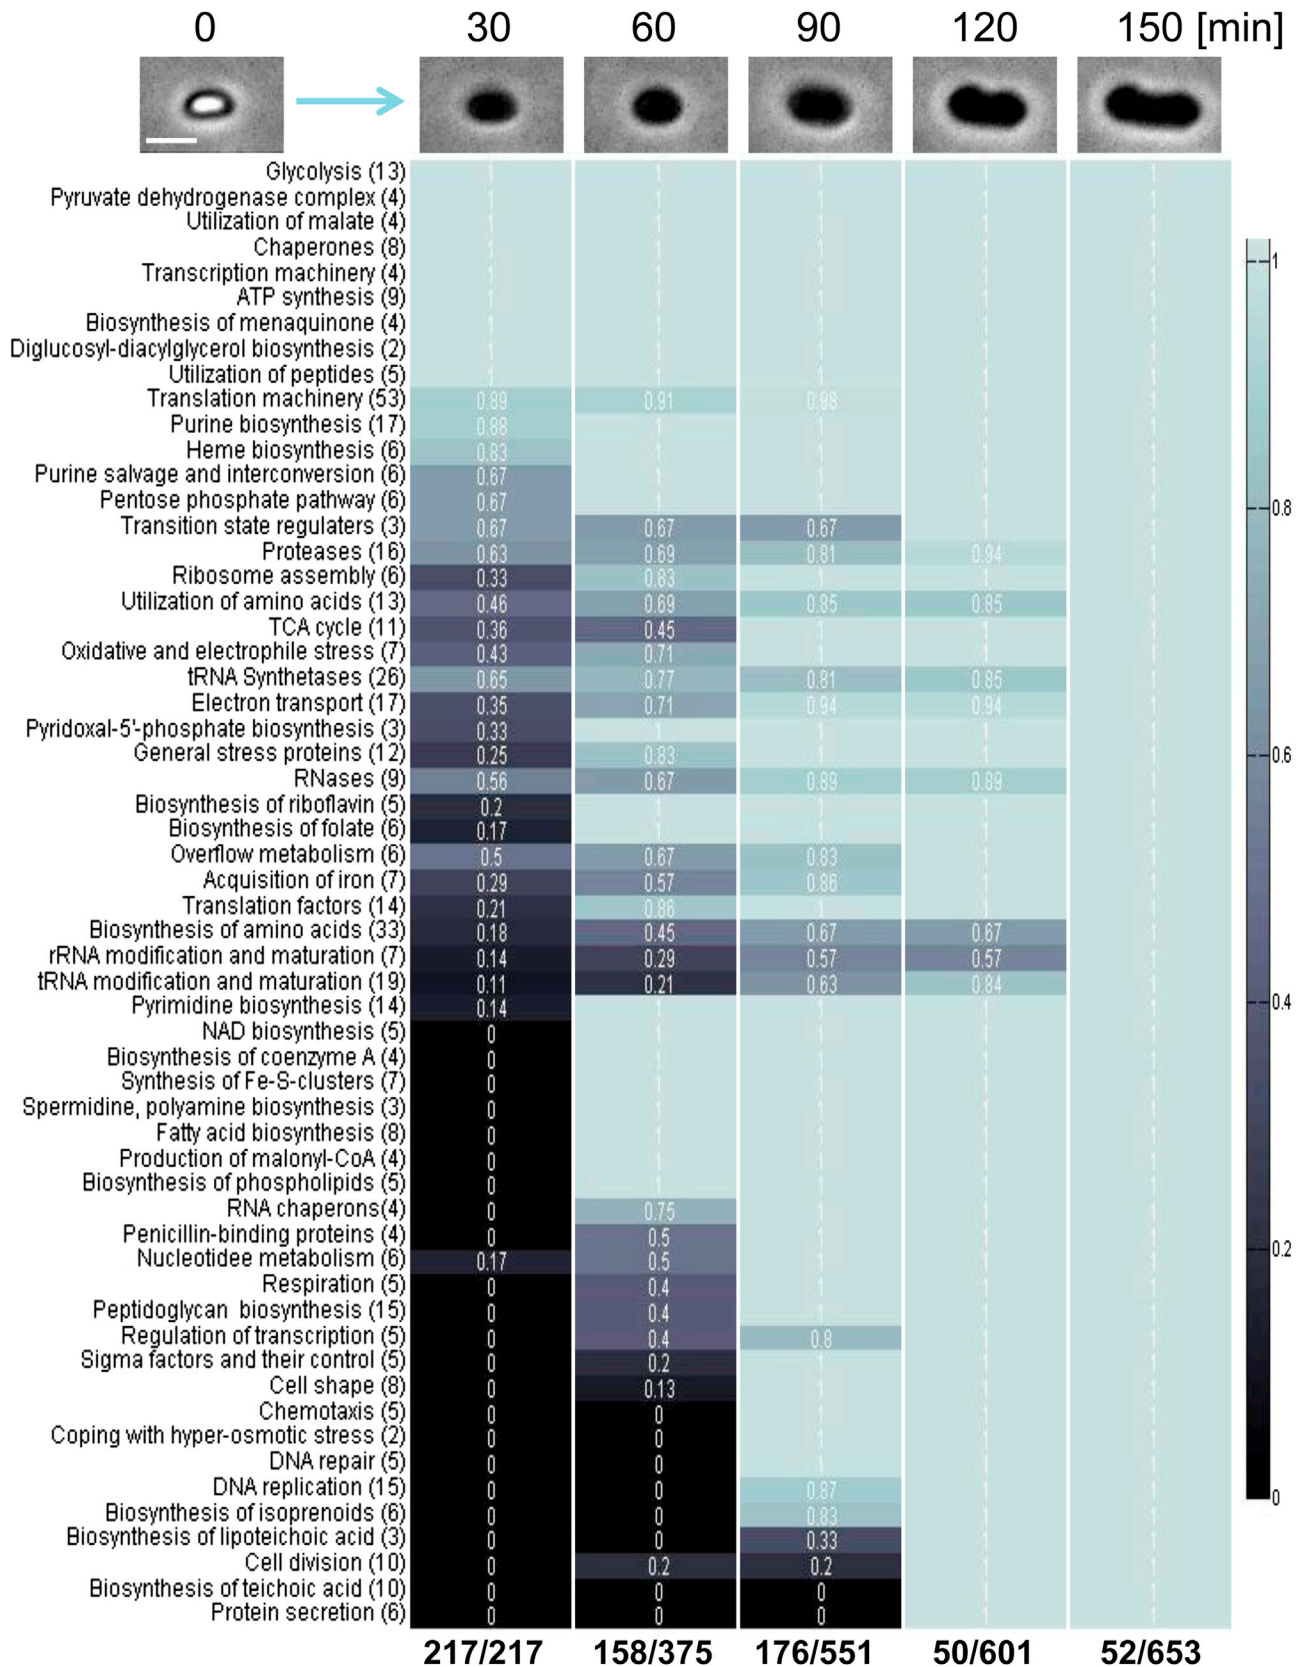

(legend on next page)

the *pur* genes are induced in response to glucose contained in the revival medium, whereas the *pyr* genes are known to be controlled by pyrimidine availability (Blencke et al., 2003). This proteomic profile supports a model whereby RNA transcription is initially based on the spore pre-existing nucleotide reservoir, and only during ripening newly generated nucleotides are utilized. This model is in accord with the observation of Setlow and Kornberg (1970a) that de novo nucleotide biosynthesis initiates early during revival and relies on re-establishment of translation, as well as with our earlier finding that during ripening the spore is engaged in synthesizing large amounts of rRNA required to build up new ribosomes (Segev et al., 2013).

Along with membrane and nucleotide biosynthesis, several pathways related to cofactor production were induced at this time, including proteins involved in NAD, riboflavin, pyridoxal-phosphate, folate and coenzyme A production, which are required for numerous enzymatic activities. In parallel, general and oxidative stress proteins were highly induced (Figure 2; Table S1). This activation might be associated with the hydration of the spore core and activation of metabolism, events likely to generate oxidative stress (Ibarra et al., 2008).

### From Outgrowth into Vegetative Growth

At 90 min into revival, spore size was increased (Figures 1B and 1C), indicating the initiation of outgrowth. Accordingly, processes related to cell wall synthesis and cell elongation were fully activated, as evidenced by the production of proteins involved in peptidoglycan (PG) biosynthesis and cell shape determination (Figure 2; Table S1). Furthermore, the main energy producing cellular pathways, tricarboxylic acid cycle (TCA) and respiration, were entirely induced to facilitate spore growth (Figure 2; Table S1). At this point, the spore was capable of generating the complete set of building molecules, essential for cell outgrowth and elongation. In light of this increased metabolic activity, the spore produced DNA metabolic proteins required to repair the damaged genome and to carry out replication in preparation for the upcoming division (Figures 2 and 3; Table S1).

A more significant increase in size of the reviving spore was apparent at  $t = 120$  min, with the spore accomplishing the conversion into a rod shape vegetative cell by  $t = 150$  min (Figure 1B). Approximately 100 proteins were added to the revival proteome during these later phases, with the majority being components associated with ongoing processes. Nevertheless, three major pathways, including cell division, biosynthesis of teichoic and lipoteichoic acids, and protein secretion, were largely activated only at  $t = 120$  min (Figures 2 and 3; Table S1). Interestingly, the assembly of the division machinery correlated with the observed morphological changes. A total of 10 bona fide cell division proteins were identified during the course of spore

revival. The two initial division components, FtsZ and FtsA, were detected as early as 60 min post-induction of revival, while the others were first identified only at  $t = 120$  min (Figure 2; Table S1). Observing the dynamics of FtsZ-GFP during revival revealed detectable fluorescence at  $t = 60$  min; however, Z-ring formation occurred only at  $t = 120$  min (Figure 3). Consistently, EzrA, one of the late cell division proteins, was produced and localized to the division site of a reviving spore only at  $t = 120$  min (Figure 3). Thus, it seems that the temporal production of cell division components contributes to the proper assembly of the division ring. A similar gradual activation pattern was observed for components required for cell wall construction. Notably, the PG synthesizing enzymes were produced at  $t = 90$  min, early during outgrowth, while the teichoic and lipoteichoic acids biosynthesis enzymes were produced later on (Figures 2 and 3; Table S1). This sequential pattern of cell wall production suggests that PG construction precedes teichoic and lipoteichoic acid synthesis.

### Protein Synthesis Is Carried Out during Germination and Required for the Process to Occur

The first 30 min of revival are composed of two phases: germination, taking place approximately at the first 15 min, and early ripening (Figure 1C). We next zoomed into this time period to investigate the long-outstanding question of whether protein synthesis takes place during germination. It has been shown previously that *Bacilli* spores are capable of undergoing germination in the presence of RNA and protein synthesis inhibitors (Steinberg et al., 1965; Vinter, 1970). However, some doubts have been raised concerning these observations, as drugs may not be capable of penetrating the spore protective shells at this early stage (Sussman and Douthit, 1973; Tisdale and DeBusk, 1972). To elucidate this issue, we incubated spores with antibiotics that inhibit translation and are soluble in ethanol, which was shown to increase spore permeability (Tanimoto et al., 1996). Remarkably, when spores were incubated with either lincomycin or tetracycline and then induced to germinate with L-alanine, approximately 80%–90% of the spore population was clearly inhibited from germinating, as manifested by their phase bright appearance (Figure 4A; Table S3). Moreover, incubation with both antibiotics blocked germination in more than 99% of the spores (Table S3), indicating that translation is required for the process. Further analysis of the antibiotic treated spores revealed that upon induction of germination, they released DPA at kinetics similar to that of untreated spores and lost their heat resistance (Figure 4B; Table S4). Thus, the antibiotic-treated spores initiated germination, but were most likely blocked prior to cortex hydrolysis as they still remained phase bright (Moir and Smith, 1990).

### Figure 2. The Temporal Landscape of the Newly Synthesized Proteins during Spore Revival

Spores of LS5 ( $\Delta metE$ ) strain were incubated in revival medium in which methionine was replaced by AHA. Samples were collected at the indicated time points and processed as described in Figure 1A. The newly synthesized proteins were categorized into groups representing different molecular processes. The total number of proteins related to each group is indicated in parenthesis (data extracted from Table S1). The colors (see colors bar) and numbers (in white) indicate the relative fraction of proteins that was detected at a specific time point out of the total identified proteins for each group throughout revival. The numbers below summarize the amount of newly detected proteins out of the total detected proteins at each time point. Shown above are corresponding phase contrast images of a single reviving spore. Scale bar represents 1  $\mu\text{m}$ .

See also Figure S1.

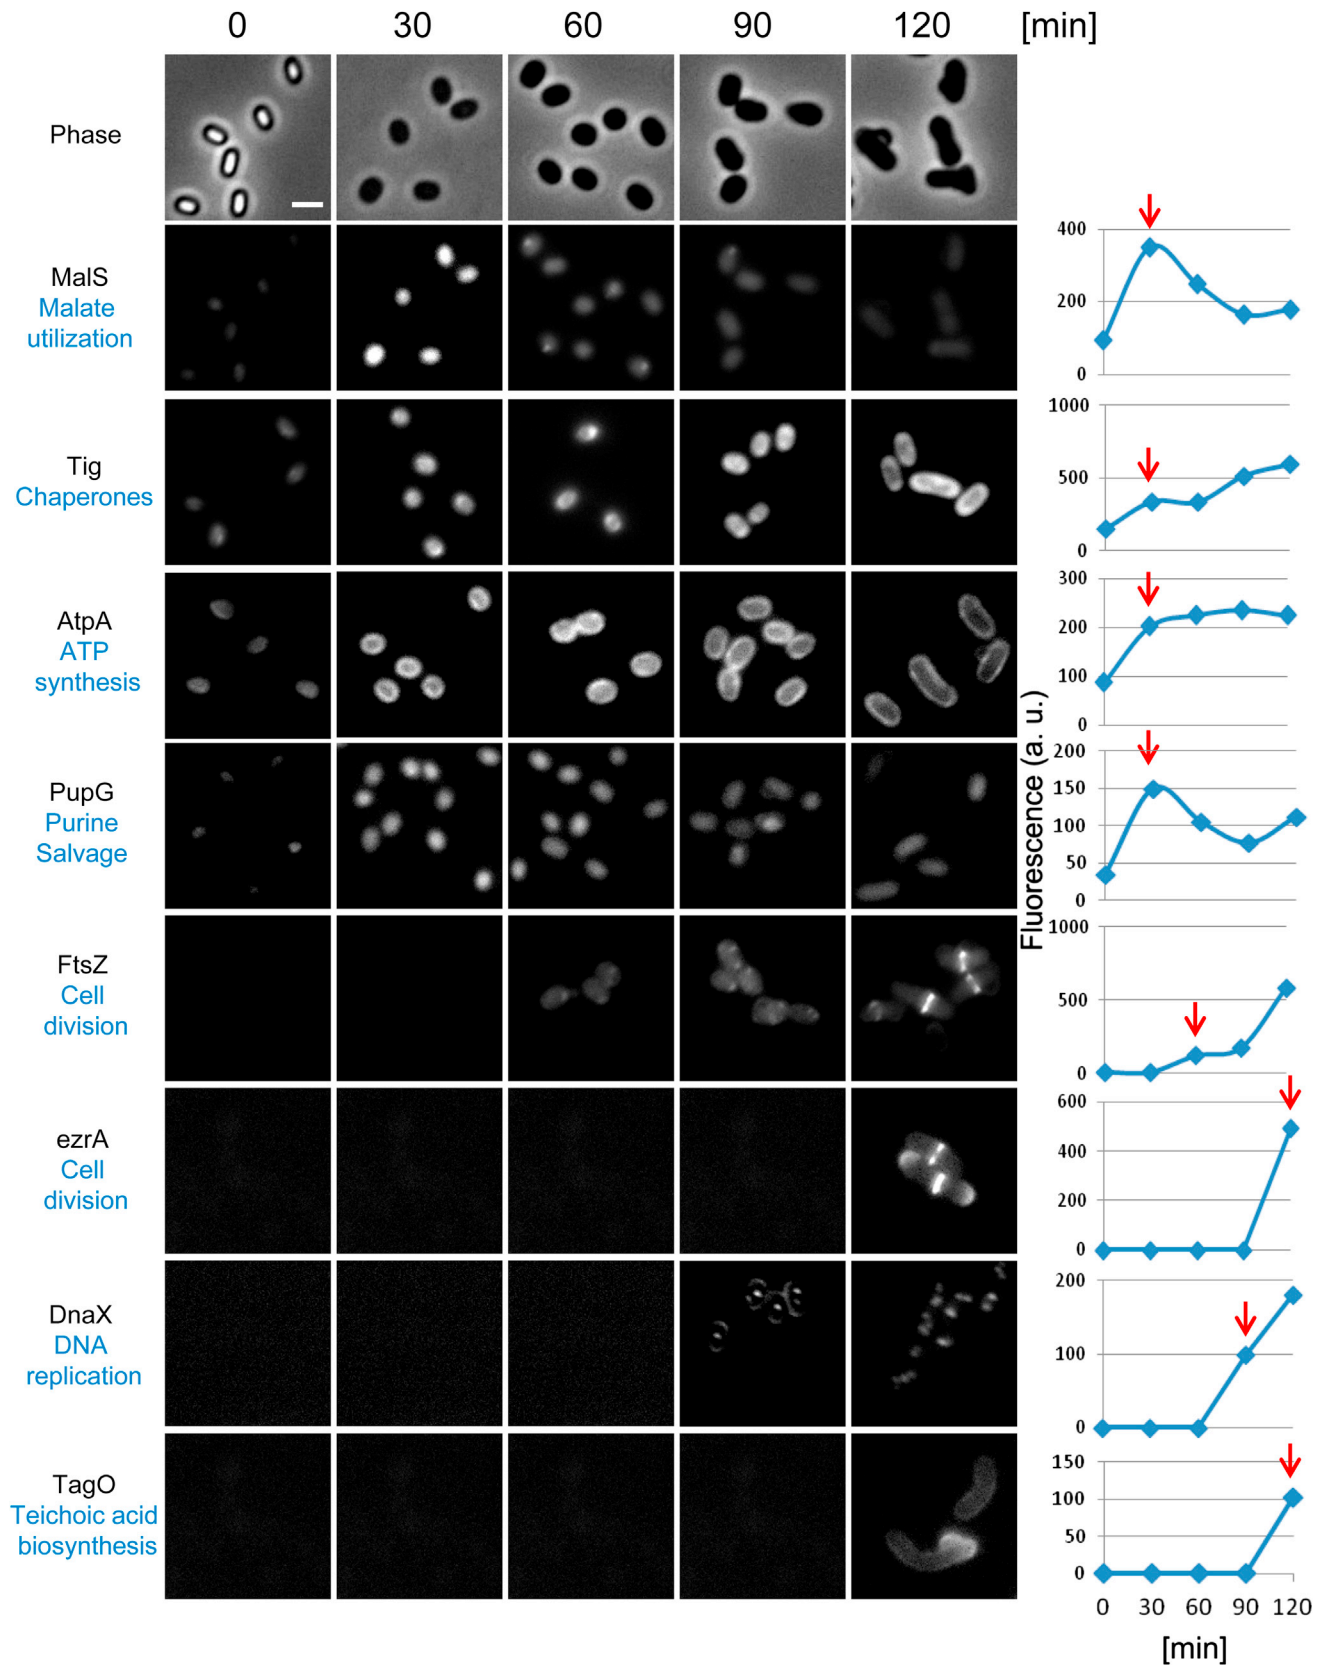

(legend on next page)

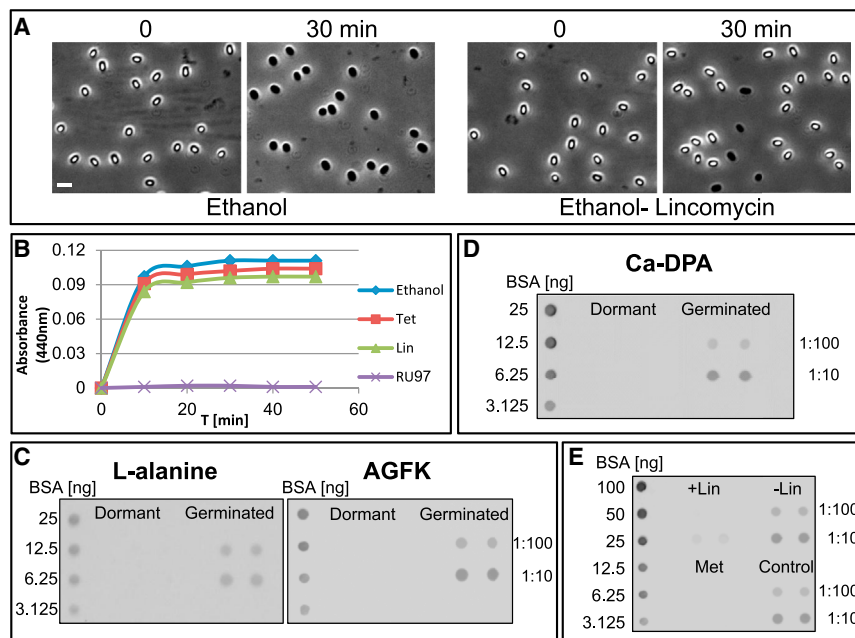

**Figure 4. Protein Synthesis Is Carried Out during Germination and Required for the Process to Occur**

(A) PY79 (WT) spores were incubated at 37°C for 2 hr in ethanol with or without lincomycin (250  $\mu$ g/ml). Next, spores were washed with phosphate buffer and incubated with L-alanine for 30 min. Shown are phase-contrast images of spores incubated with (right) or without (left) lincomycin, before (t = 0) and after (t = 30 min) L-alanine addition. Scale bar represents 1  $\mu$ m.

(B) PY79 (WT) spores were incubated at 37°C for 2 hr in ethanol with or without lincomycin (250  $\mu$ g/ml) or tetracycline (250  $\mu$ g/ml). Next, spores were washed with phosphate buffer and incubated with L-alanine. The DPA release to the medium was determined as a measurement of OD<sub>440</sub>. The non-germinating strain RU97 ( $\Delta$ gerAA) was used as a control.

(C and D) Spores of LS5 ( $\Delta$ metE) strain were induced to germinate with L-alanine (C, left), AGFK (C, right) for 30 min or with Ca-DPA (D) for 60 min in the presence of AHA. Shown are dot blot analyses of protein samples (in duplicates) that were collected before (t = 0, dormant) and after (t = 30, germinated) germination induction. Samples were diluted (1:100 and 1:10) and spotted on a mem-

brane that was subsequently probed with anti-biotin antibodies. The obtained signal was compared with known amounts of biotinylated BSA.

(E) Spores of LS5 ( $\Delta$ metE) strain were incubated at 37°C for 2 hr in ethanol with (+Lin) or without (–Lin) lincomycin (250  $\mu$ g/ml) or in double-distilled water (DDW) (control). Next, spores were washed with phosphate buffer and incubated with L-alanine and AHA for 30 min. As a negative control, spores incubated in DDW were also germinated in the presence of methionine instead of AHA (Met). Shown is a dot blot analysis conducted as in (C and D).

We next utilized the BONCAT technique to substantiate that proteins are produced during germination. We took advantage of the observation that dormant spores undergo germination without the ability to execute outgrowth when the germinant factors L-alanine or AGFK are introduced in the absence of additional nutrients (Setlow, 2003). Accordingly, spores were incubated with L-alanine or AGFK in the presence of AHA and the absence of other nutrients. Proteins were extracted, incubated with TAP tag, and dot-blot analysis conducted. Synthesis of labeled proteins was evident for both L-alanine and AGFK germinating spores (Figure 4C). Repeating this assay with the non-nutrient germinant Ca-DPA (Setlow, 2003) corroborated that proteins are being synthesized during germination without the need for external nutrients (Figure 4D). Furthermore, protein synthesis was almost completely abolished in the presence of lincomycin (Figure 4E).

Labeled proteins synthesized during germination were then identified by mass spectrometry. A total of 116 newly synthesized proteins were monitored upon AGFK addition, while 32 and 27 proteins were identified when L-alanine and Ca-DPA were utilized as germinant factors, respectively (Table S5). Anal-

ysis of the synthesized proteins revealed that the majority of the proteins detected following L-alanine or Ca-DPA addition were identical (24 of the identified proteins) and included in the list of proteins monitored upon AGFK supplementation (Table S5). The proteins monitored in all assays were part of the revival proteome at t = 30 min (Tables S1 and S5). A comparison of the obtained proteomes when categorized into functional groups provided a higher resolution of the earliest events occurring during revival (Table S6). Ca-DPA and L-alanine, which are relatively minimal sources that can trigger spore germination, activated synthesis of proteins categorized into glycolysis, PDH complex, malate utilization, translation elongation, chaperones, and oxidative stress (Table S6). On the other hand, the combination of AGFK triggering molecules supported the synthesis of components belonging to additional pathways, including transcription and translation machineries, electron transport, RNA degradation, and proteolysis (Table S6).

We conclude that protein synthesis is carried out during germination and necessary for its completion. Furthermore, the small group of proteins synthesized in response to Ca-DPA and L-alanine may exclusively represent the germination proteome.

**Figure 3. Monitoring Fluorescence of Representative Proteins Fused to GFP throughout Spore Revival**

Representative proteins from the indicated functional groups (derived from Table S1 and Figure 2) were fused to GFP and monitored for time of production during spore revival using fluorescence microscopy. GFP fluorescence images acquired at the indicated time points are shown. Upper panels show phase-contrast images of a strain harboring *malS-gfp*. For each strain, a representative experiment of three independent biological repeats is shown. Quantification of the fluorescence signal in arbitrary units (a.u.) is shown on the right. Fluorescence from at least 300 cells from three different fields was measured and averaged for each time point. The intensity of a WT (PY79) strain, lacking the *gfp* gene, was subtracted from the net average fluorescence intensity. Red arrows indicate the earliest time point at which a representative protein was identified by BONCAT. Scale bar represents 1  $\mu$ m.



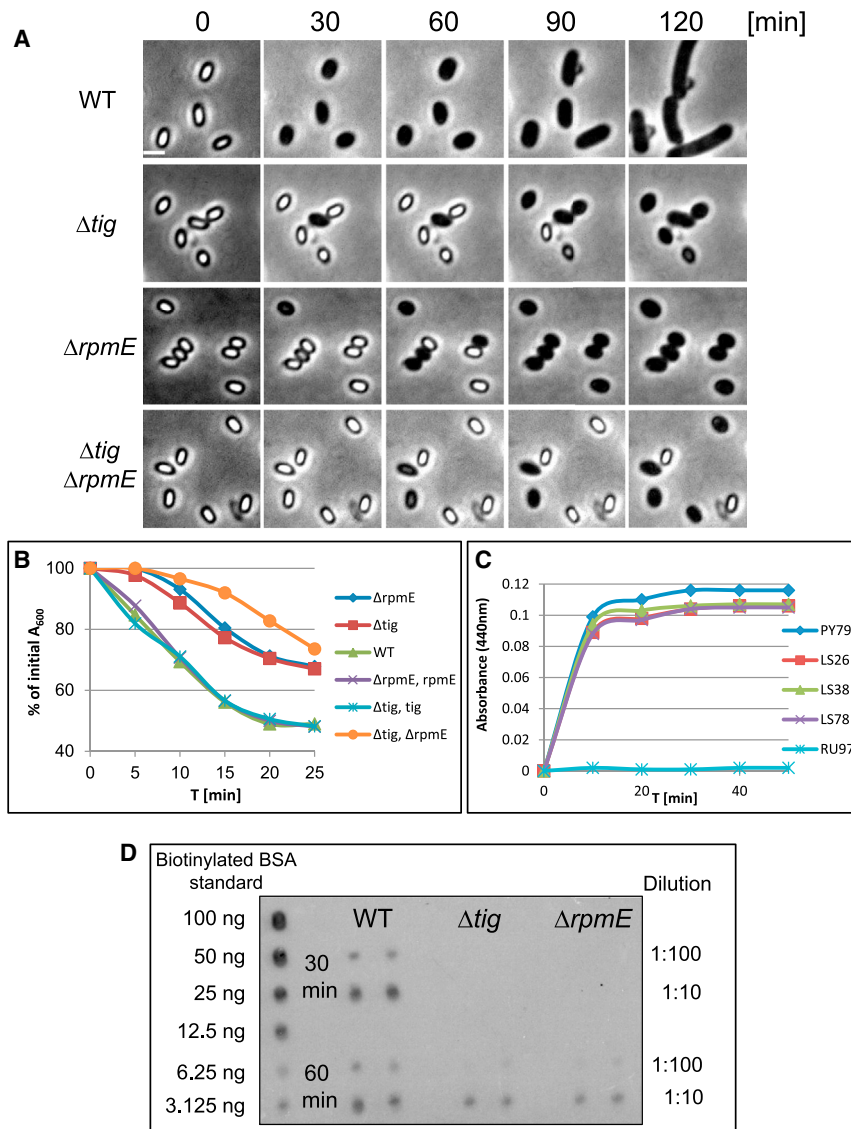

**Figure 5. The Translational Factors RpmE and Tig Play a Key Role in Spore Germination**

(A) Spores of PY79 (WT), LS38 ( $\Delta tig$ ), LS26 ( $\Delta rpmE$ ), and LS78 ( $\Delta tig \Delta rpmE$ ) strains were incubated in LB medium supplemented with L-alanine (4 mM) and monitored by time lapse microscopy. Shown are phase contrast images from a representative experiment out of three independent biological repeats. Scale bar represents 1  $\mu m$ . (B) Spores of PY79 (WT), LS38 ( $\Delta tig$ ), LS26 ( $\Delta rpmE$ ), LS78 ( $\Delta tig \Delta rpmE$ ), LS101 ( $\Delta tig, amyE::tig$ ), and LS100 ( $\Delta rpmE, amyE::rpmE$ ) strains were incubated with AGFK+ L-alanine, and optical density ( $OD_{600}$ ) was measured at the indicated time points. Data are presented as a fraction of the initial  $OD_{600}$  of the phase-bright spores. Decreasing  $OD_{600}$  signifies spore germination (Moir and Smith, 1990).

(C) Spores of PY79 (WT), LS38 ( $\Delta tig$ ), LS26 ( $\Delta rpmE$ ), LS78 ( $\Delta tig \Delta rpmE$ ), and RU97 ( $\Delta gerAA$ ) strains were incubated with L-alanine to trigger germination. DPA release to the medium was determined as a measurement of  $OD_{440}$ .

(D) Spores of LS5 ( $\Delta metE$ ) (WT), LS82 ( $\Delta metE, \Delta tig$ ), and LS83 ( $\Delta metE, \Delta rpmE$ ) strains were induced to germinate with L-alanine in the presence of AHA for 60 min. Shown is a dot blot analysis of protein samples (in duplicates) collected 30 and 60 min after germination induction. Samples were diluted (1:100 and 1:10) and spotted on a membrane that was subsequently probed with anti-biotin antibodies. The obtained signal was compared with known amounts of biotinylated bovine serum albumin. See also Figure S2.

### The Translational Factors RpmE and Tig Play a Key Role in Spore Germination

A detailed investigation of the proteins produced in response to L-alanine revealed four newly synthesized translational factors RplU, RplP, RpmE, and Tig (Table S5). RplU, RplP, and RpmE are ribosomal components constituting the 50S subunit (Akanuma et al., 2012), whereas Tig is a ribosome-associated chaperone, which interacts directly with emerging nascent polypeptides (Merz et al., 2008). We reasoned that these factors might be involved in translation of proteins during germination. Since *rpmE* and *tig* genes are nonessential for vegetative growth (Akanuma et al., 2012; Reyes and Yoshikawa, 2002), we constructed strains deleted for these genes and followed the ability of mutant spores to revive. Remarkably, both  $\Delta rpmE$  and  $\Delta tig$  mutant spores exhibited an apparent germination deficiency, as evidenced by their delay in converting from a phase-bright to a phase-dark state in comparison to the WT spores (Figures 5A and 5B). Moreover, spores harboring deletion of both factors

displayed a more severe germination defect (Figures 5A and 5B). The ability of these spores to eventually germinate suggests that additional translational factors, such as the essential components RplU and RplP (Akanuma et al., 2012), mediate this developmental transition. Closer investigation of the germinating mutant spores revealed that they released DPA and turned heat sensitive similarly to WT spores (Figure 5C; Table S4). Thus, like the antibiotic treated spores, the mutant spores initiated germination but failed to efficiently progress throughout the process. Analysis of the mutant strains during vegetative growth revealed that the  $\Delta tig$  strain grew similarly to WT, while the  $\Delta rpmE$  strain exhibited only a slight growth perturbation, suggesting that both genes acquired unique germination properties (Figure S2A). Importantly,  $\Delta rpmE$  and  $\Delta tig$  mutant strains sporulated similarly to WT cells (Figure S2D), and their germination defect was rescued by ectopic insertion of the corresponding WT alleles (Figure 5B). Since RpmE and Tig are bona fide translational factors, they could affect the global protein level within spores. It was therefore plausible that the defective germination displayed by the mutant strains was due to decreased amounts of germination receptors in spores. To rule out this possibility, we determined the levels of GerAA, GerAC, GerBC,

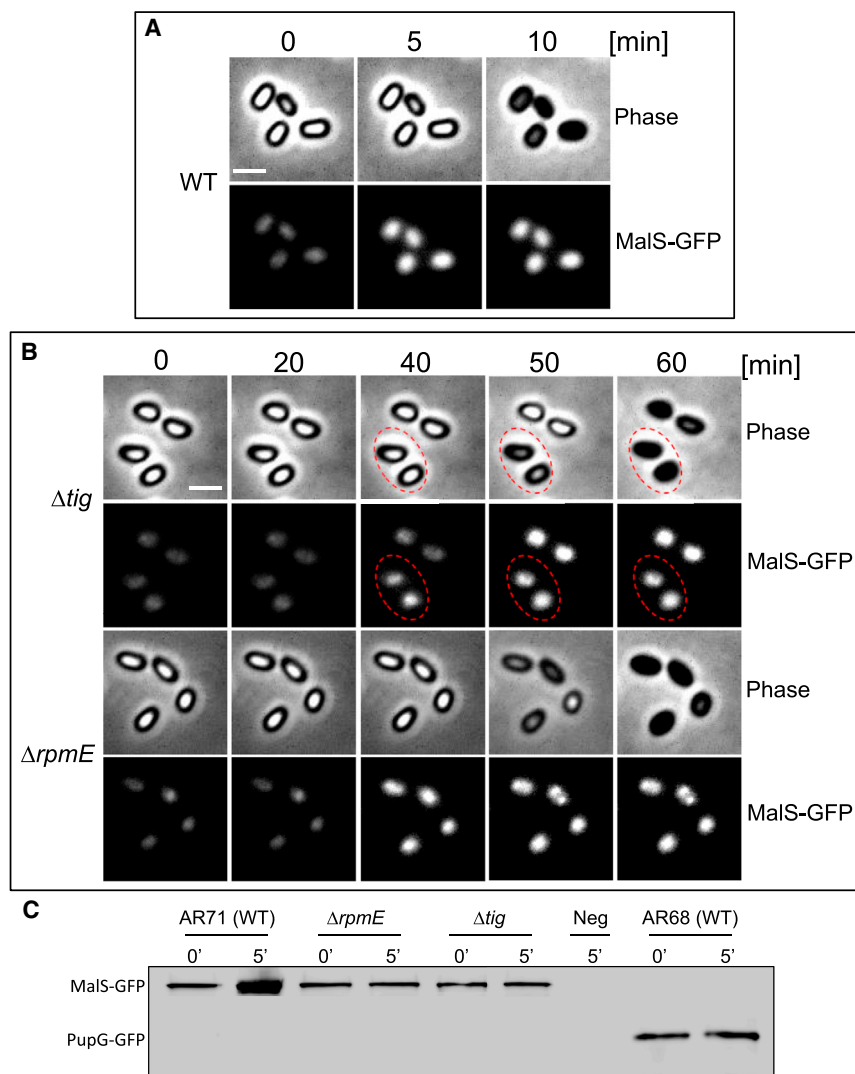

### Figure 6. Real-Time Protein Synthesis during Spore Germination

(A and B) Spores of AR71 (WT) (A) and LS80 ( $\Delta tig$ ) and LS81 ( $\Delta rpmE$ ) (B) harboring *maIS-gfp* were incubated with L-alanine and followed by time lapse microscopy. Shown are phase contrast (upper) and fluorescence (lower) images taken at the indicated time points. Dashed circles in (B) highlight spores in which increase in MaIS-GFP fluorescence is followed by germination. For each strain, images were scaled to the same intensity range. The intensity of a WT (PY79) strain, lacking the *gfp* gene, was subtracted from the net average fluorescence intensity. A representative experiment out of three independent biological repeats is shown. Scale bars represent 1  $\mu m$ .

(C) Spores of AR71 (WT, *maIS-gfp*), LS81 ( $\Delta tig$ , *maIS-gfp*), LS82 ( $\Delta rpmE$ , *maIS-gfp*), and AR68 (wild-type, *pupG-gfp*) strains were induced to germinate with L-alanine, and proteins were extracted before ( $t = 0$ ) and after ( $t = 5$  min) L-alanine addition. Equal amounts of protein extracts were subjected to western blot analysis. Membrane was probed with antibody against GFP. Proteins extracted from PY79 spores lacking *gfp* ( $t = 5$  min) were used as a negative control (Neg).

the  $\Delta rpmE$  and  $\Delta tig$  mutants, approximately 10-fold less than those found in WT spores (Figure 5D).

Finally, we wished to observe protein synthesis during germination in real time. To achieve this goal, we investigated the production of MaIS-GFP fusion by time lapse microscopy, as MaIS is one of the earliest proteins produced in germinating spores (Table S5). Remarkably, WT spores harboring MaIS-GFP fusion exhibited a dramatic increase in

GerKA, and SpoVAD in mutant and WT spores by western blot analysis (Ramirez-Peralta et al., 2012). The levels of all the investigated proteins were similar in WT and in the mutant spores (Figures S2B and S2C). In addition, the mutant spores showed lysozyme resistance levels similar to WT spores (Figure S2E), indicating that their coat is intact. Taken together, these results imply that the observed defect of the mutant strains is not due to a general deficiency in translation during sporulation but is specific to germination.

To substantiate that RpmE and Tig are required for protein production during germination, the BONCAT system was used to follow protein synthesis of  $\Delta rpmE$  and  $\Delta tig$  mutant spores during this phase. To this end, spores of the different strains were incubated only with L-alanine and AHA, and proteins were extracted from spores at 30 and 60 min post-germination induction and subjected to tagging with TAP tag followed by dot blot analysis. No detectable protein synthesis took place in the  $\Delta rpmE$  and  $\Delta tig$  mutants at  $t = 30$  min, whereas protein synthesis was clearly evident in WT spores (Figure 5D). After 60 min, relatively small amounts of newly synthesized proteins were detected in

the GFP signal as early as 5 min after germination induction by L-alanine. Evidently, under these conditions GFP folding was faster than previous estimates (Tsien, 1998). At this time, spores were clearly residing in their phase-bright state, indicating that germination was still in progress (Figure 6A). As a control, we monitored the production of PupG-GFP that was detected in spores (Figure 3), but was excluded from the germination proteome (Table S5). Consistent with our data, fluorescence from PupG-GFP did not increase during germination (Figure S3A). Furthermore, the increase in fluorescence from MaIS-GFP was considerably delayed in  $\Delta rpmE$  and  $\Delta tig$  mutant spores, detectable only 40 min after germination induction (Figure 6B). Of note, mutant spores that exhibited an increase in fluorescence progressed through germination and completed the process at the subsequent time point (Figure 6B, circles). These results were further corroborated by western blot analysis (Figures 6C and S3B).

We surmise that protein synthesis during germination considerably relies on the translational factors RpmE and Tig, which are produced early during the process.

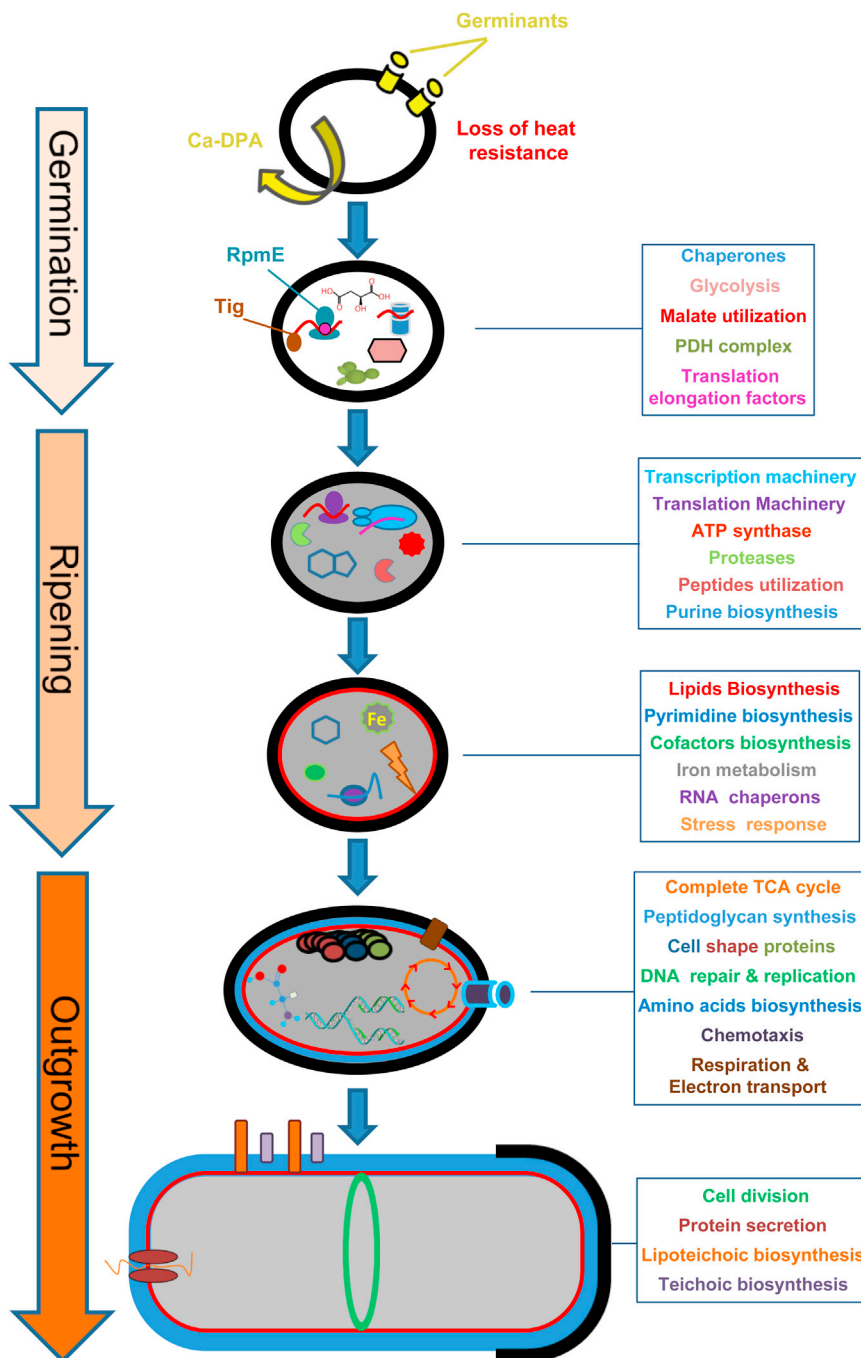

## DISCUSSION

The fascinating awakening of the bacterial spore provides an exceptional opportunity to delineate the spatial and temporal molecular events vital to construct a fully functional cell. Here we succeeded in defining the timeline of the spore revival proteome. The key cellular processes turned on at each time point in the course of spore revival are summarized in Figure 7. Our investigation revealed a highly orchestrated developmental process that correlates with the spore morphological changes. Sur-

## Figure 7. The Molecular Timeline of a Reviving Bacterial Spore

The temporal activation of the indicated cellular processes, as determined by our findings, was assigned to the morphological changes occurring during spore revival. The awakening cellular processes are indicated in the square boxes and their color corresponds to the illustrated cellular processes.

prisingly, we found that protein synthesis is necessary to facilitate germination, a process traditionally considered to occur without the requirement for any macromolecule synthesis (Moir, 2006; Setlow, 2003, 2013; Steinberg et al., 1965; Vinter, 1970).

Germination of *Bacilli* spores was found to occur in the presence of RNA and protein synthesis inhibitors (Steinberg et al., 1965; Vinter, 1970). However, here we show that by increasing spore permeability we were able to introduce protein synthesis inhibitors into spores, subsequently impeding germination. Furthermore, antibiotic-treated spores initiated germination, as indicated by DPA release, but seem staled prior to cortex hydrolysis. The DPA release indicates that at least partial core rehydration occurred, allowing resumption of protein synthesis among other enzymatic activities. Accordingly, ATP synthesis from spore endogenous sources was shown to increase sharply 5 min post-germination induction and to follow DPA release (Setlow et al., 2001; Setlow and Kornberg, 1970b). In line with this view, the metabolic enzymes required for glycolysis and malate utilization were produced during germination. Interestingly, *Bacilli* spores were found to contain high levels of phosphoenolglycerate (PGA) (Nelson and Kornberg, 1970), which could serve as an immediately accessible substrate for the glycolytic enzymes to produce energy. In a similar manner, we found that

the spore harbors significant amounts of malate that can serve as a “ready to use” resource for the malic enzymes to energize revival. The observation that protein synthesis takes place during germination induced by the non-nutrient germinant Ca-DPA implies that the spore harbors a pool of amino acids required to facilitate the process. Indeed, it has been shown that the abundant small acid-soluble spore proteins, which comprise 10%–20% of the spore protein pool, are degraded in the first minutes of spore revival, providing an instant source of amino acids for early protein synthesis (Setlow, 1988). Taken together, our

findings support previous studies showing that the spore reservoir contains all elements needed for initial protein synthesis, including amino acids, ribosomes, and energy sources (Kieras et al., 1978; Setlow and Kornberg, 1970a, 1970b; Setlow and Primus, 1975).

It still remains elusive how the ribosomes are rapidly activated during germination. Our data indicate that, at least in part, this transition is facilitated by translation components, such as RpmE and Tig, that associate with the spore ribosomes. The contribution of the existing spore proteome is therefore crucial to initiate translational events. Characterization of the dormant spore proteome revealed the existence of 154 proteins of which the majority (110) are spore specific proteins or proteins with unknown function (Kuwana et al., 2002). However, only a few ribosomal components were monitored, suggesting that a more comprehensive investigation of the dormant spore proteome is required.

Our study defines the molecular events taking place during the ripening period. We have previously demonstrated that rRNA assembly is a key event occurring throughout ripening (Segev et al., 2013), and here we show that the entire array of ribosomal protein components is produced during this phase. In a complementary fashion, we found that the transcription machinery components, along with enzymes required for nucleotide biosynthesis, are produced at this stage. Notably, 12 metabolites have been defined as basic precursors for synthesis of all cellular constituents (Rokem et al., 2007). Our study suggests that spore outgrowth is initiated only after all the metabolic pathways producing these components are awakened. Accordingly, the glycolytic enzymes and the PDH complex are produced during germination, generating seven of the defined essential components: glucose-6P, fructose-6P, glyceraldehyde-3P, 3P-glycerate, phosphoenolpyruvate, pyruvate, and acetyl-CoA. Subsequently, the pentose phosphate pathway enzymes are translated at the onset of the ripening period, generating erythrose-4P and ribose-5P. Finally, the complete set of the TCA cycle enzymes is synthesized at the initiation of outgrowth, producing the remaining essential components oxaloacetate, 2-oxoglutarate, and succinyl-CoA. Thus, once the reviving spore has acquired all essential building blocks, cell size starts increasing.

Studies that use 2D gel analysis to characterize the reviving spore proteome of *Streptomyces coelicolor* (*S. coelicolor*) identified approximately 150 proteins as produced in the course of 5.5 hr of revival (Strakova et al., 2013a, 2013b). Among the earliest proteins identified were chaperones and protein modification enzymes. Our data indicate that proteins with comparable functions are produced during germination in *B. subtilis*, suggesting that these proteins play a common role in the spore awakening program of distinct bacterial species. Curiously, the investigation of spore revival in *S. coelicolor* revealed little correlation between transcription and translation (Strakova et al., 2013b). Comparing our proteome timeline to the transcriptional profile of reviving *B. subtilis* spores (Keijsers et al., 2007) also indicated a partial correlation. For instance, processes that were shown by BONCAT and light microscopy to awaken during outgrowth, such as DNA replication, cell division, and cell wall biosynthesis, seem to be transcribed during the ripening period.

Thus, translational regulation could play a role in the spore revival program.

The impermeability of the spore at the time of protein synthesis initiation should be taken into consideration when designing drugs against spore forming pathogens such as *B. anthracis*, which causes anthrax, and *Bacillus cereus*, which causes food borne disease (Driks, 2002; Setlow, 2003). Our identification of RpmE and Tig as key factors for protein synthesis during germination may provide new therapeutic targets and pave the way for development of more effective drugs. In line with this possibility, Tig was found to be among the seven proteins identified to be synthesized during revival of *B. anthracis* spores (Huang et al., 2004). RpmE and Tig are not specific to spore formers and are highly conserved among both Gram-positive and -negative bacteria. However, their dispensability for vegetative growth in *B. subtilis* suggests that they might acquire unique properties in spore formers, yet to be elucidated.

## EXPERIMENTAL PROCEDURES

### Strains and General Methods

*B. subtilis* strains are derivatives of PY79 and are listed in Table S7. Plasmids construction is described in Supplemental Experimental Procedures. Sporulation was induced at 37°C by suspending cells in Schaeffer's liquid medium (Difco Sporulation Medium [DSM]) (Harwood and Cutting, 1990), and mature spores were purified as described in Supplemental Experimental Procedures. Purified spores were heat activated (80°C, 30 min) prior to germination and revival experiments. Unless indicated differently, spore revival was induced at 37°C by suspending spores in revival medium composed of S7 minimal medium (Vasanth and Freese, 1980) supplemented with AGFK (2.5 mM L-asparagine, 5 mg/ml D-glucose, 5 mg/ml D-fructose, 50 mM KCl), 0.01 M alanine, and all additional amino acids in concentrations suitable for *B. subtilis* (Harwood and Cutting, 1990). For BONCAT experiments, AHA (200 mg/l; Anaspec) was used instead of methionine. For germination induction by L-alanine and AGFK, heat-activated spores were incubated for 30 min, a time in which 99% of the WT spores completed germination. For germination induced by Ca<sup>2+</sup>-DPA, heat-activated spores were incubated in 60 mM Ca<sup>2+</sup>-DPA (pH 8.3) for 60 min at room temperature.

### BONCAT Spore Revival Experiments

Cultures of 100 ml of reviving spores were centrifuged and washed with PBS ×1. Pellets were resuspended in PBS ×1 supplemented with protease inhibitors (Thermo, 78439), lysed using FastPrep (MP) (6.5, 60 s, ×3), and centrifuged (5 min, 14,000 RPM). Under these conditions, less than 0.01% of the spore population remained intact. Supernatants containing a mixed population of AHA-labeled newly synthesized proteins and unlabeled pre-existing proteins were collected. The enrichment for newly translated proteins was performed using BONCAT, as previously described (Dieterich et al., 2007), with the following modifications. For tagging of AHA-labeled proteins, samples were incubated overnight at 4°C with triazole ligand (0.25 mM; Sigma), alkyne-bearing biotin-flag tag (0.063 mM; Genscript), and CuBr (2 mM in DMSO; Sigma). Trypsin-digested samples were analyzed by LC-MS/MS on LTQ-Orbitrap (Thermo). Each presented BONCAT dataset is based on three independent biological repeats. The proteins displayed in Tables S1, S2, and S5 were detected in all repeats. In each experiment, at least 35% of the proteins were identified based on AHA containing peptides, and the majority of the proteins (>95%) were identified based on at least three different peptides. In each experiment, a methionine sample was added as a control. The number of identified proteins in the methionine control samples was always below 1% of the proteins identified in the parallel AHA samples and included mainly abundant spore specific proteins. These proteins were excluded from the analysis.

Additional experimental procedures, including light microscopy, spores purification, L-malate determination, DPA measurements, determination of the

levels of spore germination proteins, western blot analysis, and spore resistance to lysozyme treatment, are described in the [Supplemental Experimental Procedures](#).

### SUPPLEMENTAL INFORMATION

Supplemental Information includes Supplemental Experimental Procedures, three figures, and seven tables and can be found with this article online at <http://dx.doi.org/10.1016/j.molcel.2014.12.019>.

### ACKNOWLEDGMENTS

We are grateful to members of the Ben-Yehuda laboratory and G. Bachrach, I. Goldberg, J.S. Rokem, I. Rosenshine, and A. Taraboulos (Hebrew University), R. Losick (Harvard University), and A. Rouvinski (Pasteur Institute) for valuable discussions and comments on the manuscript. We thank P. Setlow (UConn) for generously providing antibodies and K.M. Devine (Trinity College) and A. Driks (Loyola University) for strains. We thank the Smoler Proteomic Center at the Department of Biology, Technion, for mass spectrometry services. This work was supported by the European Research Council (ERC) Starting Grant (209130) and ERC Advance Grant (339984) awarded to S.B.-Y.

Received: October 21, 2014

Revised: December 1, 2014

Accepted: December 12, 2014

Published: February 5, 2015

### REFERENCES

- Akanuma, G., Nanamiya, H., Natori, Y., Yano, K., Suzuki, S., Omata, S., Ishizuka, M., Sekine, Y., and Kawamura, F. (2012). Inactivation of ribosomal protein genes in *Bacillus subtilis* reveals importance of each ribosomal protein for cell proliferation and cell differentiation. *J. Bacteriol.* **194**, 6282–6291.
- Blencke, H.M., Homuth, G., Ludwig, H., Mäder, U., Hecker, M., and Stülke, J. (2003). Transcriptional profiling of gene expression in response to glucose in *Bacillus subtilis*: regulation of the central metabolic pathways. *Metab. Eng.* **5**, 133–149.
- Dieterich, D.C., Lee, J.J., Link, A.J., Graumann, J., Tirrell, D.A., and Schuman, E.M. (2007). Labeling, detection and identification of newly synthesized proteomes with bioorthogonal non-canonical amino-acid tagging. *Nat. Protoc.* **2**, 532–540.
- Driks, A. (2002). Maximum shields: the assembly and function of the bacterial spore coat. *Trends Microbiol.* **10**, 251–254.
- Harwood, C.R., and Cutting, S.M. (1990). *Molecular Biological Methods for Bacillus*. (Chichester, New York: Wiley).
- Hecker, M., Wachlin, G., Dunger, A.M., and Mach, F. (1984). Protein-synthesis during outgrowth of *Bacillus subtilis* spores. A two-dimensional gel-electrophoresis study. *FEMS Microbiol. Lett.* **25**, 57–60.
- Huang, C.M., Foster, K.W., DeSilva, T.S., Van Kampen, K.R., Elmets, C.A., and Tang, D.C. (2004). Identification of *Bacillus anthracis* proteins associated with germination and early outgrowth by proteomic profiling of anthrax spores. *Proteomics* **4**, 2653–2661.
- Ibarra, J.R., Orozco, A.D., Rojas, J.A., López, K., Setlow, P., Yasbin, R.E., and Pedraza-Reyes, M. (2008). Role of the Nfo and ExoA apurinic/aprimidinic endonucleases in repair of DNA damage during outgrowth of *Bacillus subtilis* spores. *J. Bacteriol.* **190**, 2031–2038.
- Keijser, B.J.F., Ter Beek, A., Rauwerda, H., Schuren, F., Montijn, R., van der Spek, H., and Brul, S. (2007). Analysis of temporal gene expression during *Bacillus subtilis* spore germination and outgrowth. *J. Bacteriol.* **189**, 3624–3634.
- Kieras, R.M., Preston, R.A., and Douthit, H.A. (1978). Isolation of stable ribosomal subunits from spores of *Bacillus cereus*. *J. Bacteriol.* **136**, 209–218.
- Kuwana, R., Kasahara, Y., Fujibayashi, M., Takamatsu, H., Ogasawara, N., and Watabe, K. (2002). Proteomics characterization of novel spore proteins of *Bacillus subtilis*. *Microbiology* **148**, 3971–3982.
- Merz, F., Boehringer, D., Schaffitzel, C., Preissler, S., Hoffmann, A., Maier, T., Rutkowska, A., Lozza, J., Ban, N., Bukau, B., and Deuerling, E. (2008). Molecular mechanism and structure of Trigger Factor bound to the translating ribosome. *EMBO J.* **27**, 1622–1632.
- Meyer, F.M., and Stülke, J. (2013). Malate metabolism in *Bacillus subtilis*: distinct roles for three classes of malate-oxidizing enzymes. *FEMS Microbiol. Lett.* **339**, 17–22.
- Moir, A. (2006). How do spores germinate? *J. Appl. Microbiol.* **101**, 526–530.
- Moir, A., and Smith, D.A. (1990). The genetics of bacterial spore germination. *Annu. Rev. Microbiol.* **44**, 531–553.
- Nelson, D.L., and Kornberg, A. (1970). Biochemical studies of bacterial sporulation and germination. XIX. Phosphate metabolism during sporulation. *J. Biol. Chem.* **245**, 1137–1145.
- Ramirez-Peralta, A., Zhang, P., Li, Y.Q., and Setlow, P. (2012). Effects of sporulation conditions on the germination and germination protein levels of *Bacillus subtilis* spores. *Appl. Environ. Microbiol.* **78**, 2689–2697.
- Reyes, D.Y., and Yoshikawa, H. (2002). DnaK chaperone machine and trigger factor are only partially required for normal growth of *Bacillus subtilis*. *Biosci. Biotechnol. Biochem.* **66**, 1583–1586.
- Rokem, J.S., Lantz, A.E., and Nielsen, J. (2007). Systems biology of antibiotic production by microorganisms. *Nat. Prod. Rep.* **24**, 1262–1287.
- Santo, L.Y., and Doi, R.H. (1974). Ultrastructural analysis during germination and outgrowth of *Bacillus subtilis* spores. *J. Bacteriol.* **120**, 475–481.
- Segev, E., Smith, Y., and Ben-Yehuda, S. (2012). RNA dynamics in aging bacterial spores. *Cell* **148**, 139–149.
- Segev, E., Rosenberg, A., Mamou, G., Sinai, L., and Ben-Yehuda, S. (2013). Molecular kinetics of reviving bacterial spores. *J. Bacteriol.* **195**, 1875–1882.
- Setlow, P. (1988). Small, acid-soluble spore proteins of *Bacillus* species: structure, synthesis, genetics, function, and degradation. *Annu. Rev. Microbiol.* **42**, 319–338.
- Setlow, P. (2003). Spore germination. *Curr. Opin. Microbiol.* **6**, 550–556.
- Setlow, P. (2013). Summer meeting 201—when the sleepers wake: the germination of spores of *Bacillus* species. *J. Appl. Microbiol.* **115**, 1251–1268.
- Setlow, P., and Kornberg, A. (1970a). Biochemical studies of bacterial sporulation and germination. 23. Nucleotide metabolism during spore germination. *J. Biol. Chem.* **245**, 3645–3652.
- Setlow, P., and Kornberg, A. (1970b). Biochemical studies of bacterial sporulation and germination. XXII. Energy metabolism in early stages of germination of *Bacillus megaterium* spores. *J. Biol. Chem.* **245**, 3637–3644.
- Setlow, P., and Primus, G. (1975). Protein metabolism during germination of *Bacillus megaterium* spores. I. Protein synthesis and amino acid metabolism. *J. Biol. Chem.* **250**, 623–630.
- Setlow, B., Melly, E., and Setlow, P. (2001). Properties of spores of *Bacillus subtilis* blocked at an intermediate stage in spore germination. *J. Bacteriol.* **183**, 4894–4899.
- Shah, I.M., Laaberki, M.H., Popham, D.L., and Dworkin, J. (2008). A eukaryotic-like Ser/Thr kinase signals bacteria to exit dormancy in response to peptidoglycan fragments. *Cell* **135**, 486–496.
- Steinberg, W., Halvorso, H., Keynan, A., and Weinberg, E. (1965). Timing of protein synthesis during germination and outgrowth of spores of *Bacillus cereus* strain T. *Nature* **208**, 710–712.
- Stragier, P., and Losick, R. (1996). Molecular genetics of sporulation in *Bacillus subtilis*. *Annu. Rev. Genet.* **30**, 297–241.
- Strakova, E., Bobek, J., Zikova, A., Rehulka, P., Benada, O., Rehulkova, H., Kofronova, O., and Vohradsky, J. (2013a). Systems insight into the spore germination of *Streptomyces coelicolor*. *J. Proteome Res.* **12**, 525–536.
- Strakova, E., Bobek, J., Zikova, A., and Vohradsky, J. (2013b). Global features of gene expression on the proteome and transcriptome levels in *S. coelicolor* during germination. *PLoS ONE* **8**, e72842.

- Sussman, A.S., and Douthit, H.A. (1973). Dormancy in microbial spores. *Annu. Rev. Plant Physiol. Plant Mol. Biol.* *24*, 311–352.
- Tanimoto, Y., Ichikawa, Y., Yasuda, Y., and Tochikubo, K. (1996). Permeability of dormant spores of *Bacillus subtilis* to gramicidin S. *FEMS Microbiol. Lett.* *136*, 151–156.
- Tisdale, J.H., and DeBusk, A.G. (1972). Permeability problems encountered when treating conidia of *neurospora crassa* with RNA synthesis inhibitors. *Biochem. Biophys. Res. Commun.* *48*, 816–822.
- Torriani, A., and Levinthal, C. (1967). Ordered synthesis of proteins during outgrowth of spores of *Bacillus cereus*. *J. Bacteriol.* *94*, 176–183.
- Tsien, R.Y. (1998). The green fluorescent protein. *Annu. Rev. Biochem.* *67*, 509–544.
- Vasanth, N., and Freese, E. (1980). Enzyme changes during *Bacillus subtilis* sporulation caused by deprivation of guanine nucleotides. *J. Bacteriol.* *144*, 1119–1125.
- Vinter, V. (1970). Symposium on bacterial spores: V. Germination and outgrowth: effect of inhibitors. *J. Appl. Bacteriol.* *33*, 50–59.
- Zamboni, N., Fischer, E., Laudert, D., Aymerich, S., Hohmann, H.P., and Sauer, U. (2004). The *Bacillus subtilis* *yqjI* gene encodes the NADP<sup>+</sup>-dependent 6-P-gluconate dehydrogenase in the pentose phosphate pathway. *J. Bacteriol.* *186*, 4528–4534.

**Molecular Cell, Volume 57**

**Supplemental Information**

**The Molecular Timeline of a Reviving Bacterial Spore**

Lior Sinai, Alex Rosenberg, Yoav Smith, Einat Segev, and Sigal Ben-Yehuda

Figure S1

A

| Strain                | $\mu\text{moles of L-malate per g of cells/spores}$ |
|-----------------------|-----------------------------------------------------|
| PY79 vegetative cells | Below calibration curve values                      |
| PY79 spores           | 30.5                                                |
| LS86                  | 30.7                                                |

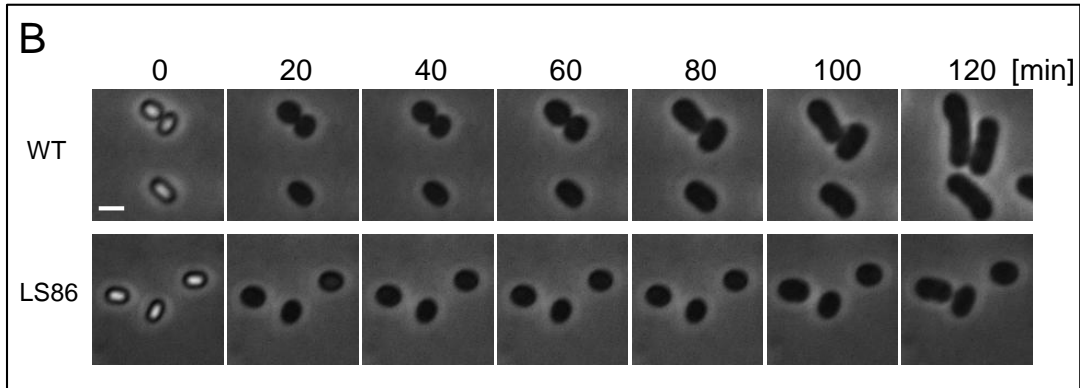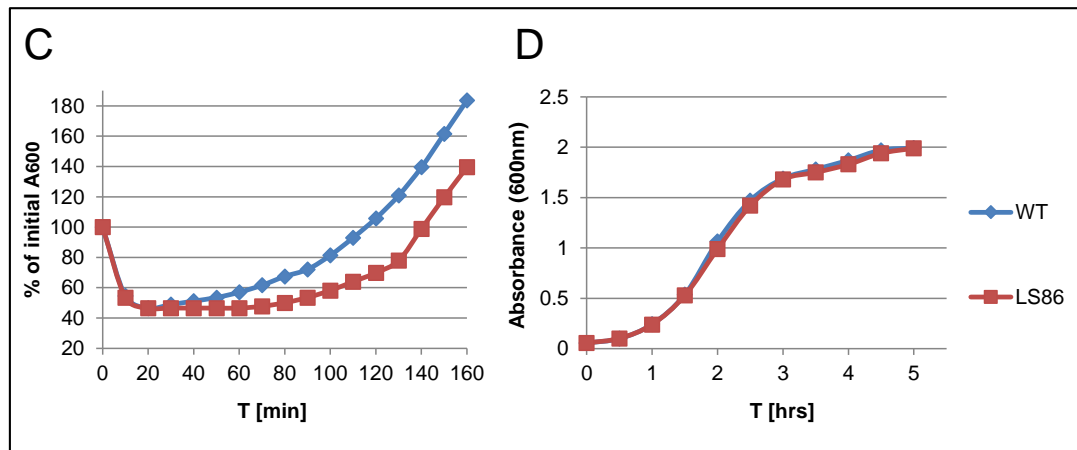



Figure S2

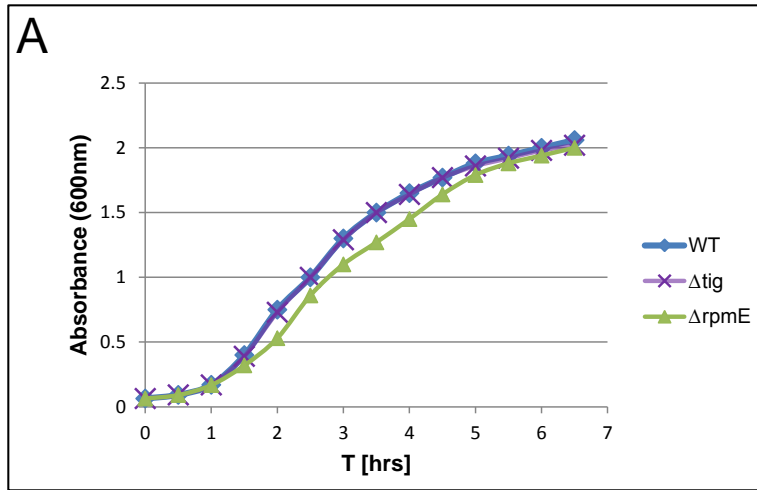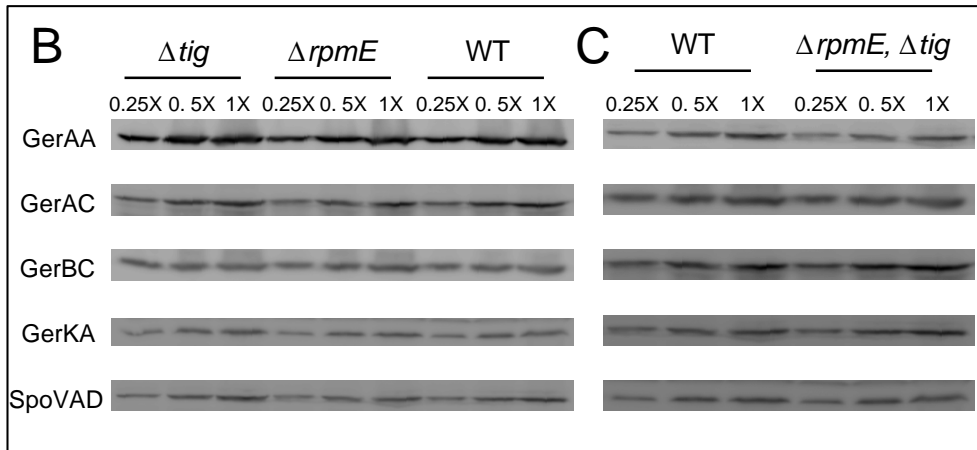

**D**

| Strain | Genotype                  | Spores/ml          |
|--------|---------------------------|--------------------|
| PY79   | Wild type                 | $2.71 \times 10^8$ |
| LS38   | $\Delta tig$              | $2.59 \times 10^8$ |
| LS26   | $\Delta rpmE$             | $2.11 \times 10^8$ |
| LS78   | $\Delta tig, \Delta rpmE$ | $2.01 \times 10^8$ |

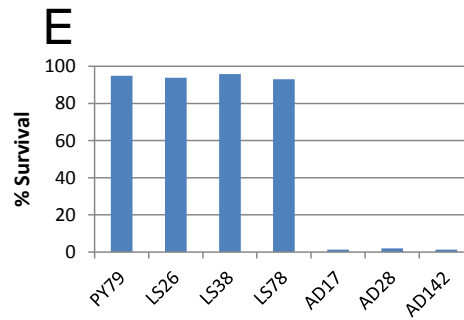

Figure S3

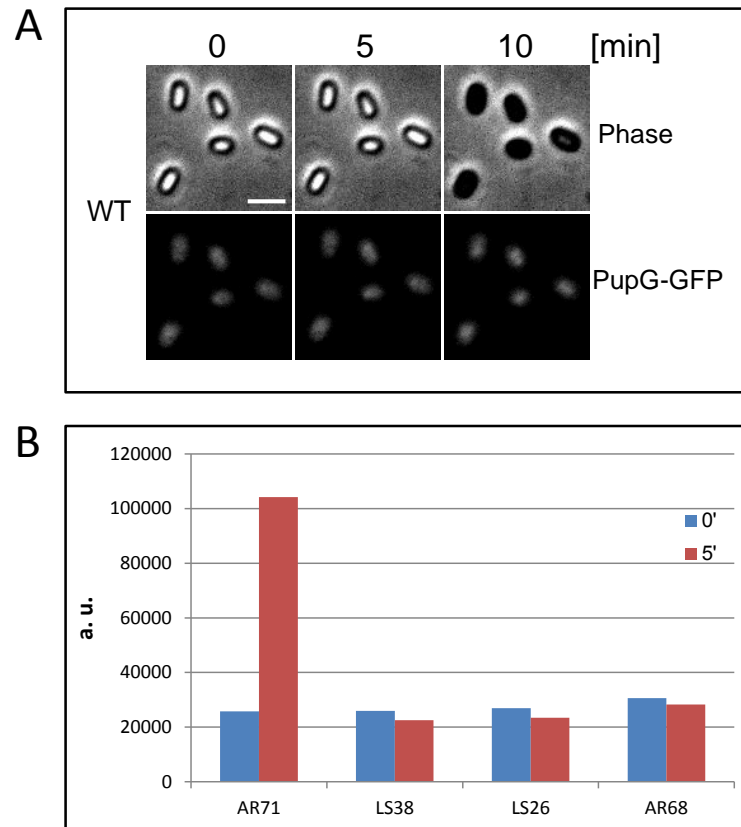

## **Figure S1. Spores store malate as a carbon source to energize revival**

### **Related to Figure 2**

(A) Equal dry weight (4 mg) of PY79 (wild type, WT) spores, LS86 ( $\Delta maeA$ ,  $\Delta malS$ ,  $\Delta mleA$ ,  $\Delta ytsJ$ ) spores and WT vegetative cells were lysed, and extracts were subjected to malate dehydrogenase assay (see Supplemental Experimental Procedures). Malate concentration was determined by comparing OD<sub>340</sub> values to a standard curve of known increasing malate concentrations.

(B) Spores of PY79 (wild type, WT) and LS86 ( $\Delta MaeA$ ,  $\Delta MalS$ ,  $\Delta MleA$ ,  $\Delta YtsJ$ ) strains were incubated in revival medium and monitored by time lapse microscopy. Shown are phase contrast images acquired at 20 min intervals. Scale bar represents 1  $\mu$ m.

(C) Spores of PY79 (wild type, WT) and LS86 ( $\Delta MaeA$ ,  $\Delta MalS$ ,  $\Delta MleA$ ,  $\Delta YtsJ$ ) strains were incubated in revival medium and optical density (OD<sub>600</sub>) was measured at the indicated time points. Data are presented as a fraction of the initial OD<sub>600</sub> of the phase-bright spores. Decreasing OD<sub>600</sub> signifies spore germination, and increasing OD<sub>600</sub> indicates spore outgrowth (Moir and Smith, 1990).

(D) PY79 (wild type, WT) and LS86 ( $\Delta MaeA$ ,  $\Delta MalS$ ,  $\Delta MleA$ ,  $\Delta YtsJ$ ) strains were diluted to OD<sub>600</sub>=0.05 in S7 minimal medium supplemented with amino acids, incubated at 37°C and optical density (OD<sub>600</sub>) was measured during growth at the indicated time points.

## **Figure S2. Characterization of $\Delta tig$ and $\Delta rpmE$ mutant strains**

### **Related to Figure 5**

(A) PY79 (wild type, WT), LS38 ( $\Delta tig$ ), and LS26 ( $\Delta rpmE$ ) strains were diluted to OD<sub>600</sub>=0.05 in LB medium, incubated at 37°C and optical density (OD<sub>600</sub>) was measured during growth at the indicated time points.

(B-C) Equal amounts of protein extracts prepared from spores of PY79 (wild type, WT), LS38 ( $\Delta tig$ ), LS26 ( $\Delta rpmE$ ) and LS78 ( $\Delta tig$ ,  $\Delta rpmE$ ) strains were subjected to SDS-PAGE followed by Western blot analysis. Membranes were probed with antibodies against GerAA, GerAC, GerBC, GerKA, and SpoVAD (see Supplemental Experimental Procedures). Dilutions of the different samples were loaded on the same gel for comparison.

(D) The indicated strains were induced to sporulate in DSM for 48 hours. Next, cultures were subjected to heat kill treatment (80°C, 30 minutes), serial decimal dilutions were plated on LB agar and colonies were counted after 24 hours. Presented are the averaged numbers of spores / ml from 3 independent biological repeats.

(E) Spores of PY79 (WT), LS26 ( $\Delta rpmE$ ), LS38 ( $\Delta tig$ ), LS78 ( $\Delta tig, \Delta rpmE$ ), AD17 (*gerE36*), AD28 ( $\Delta cotE$ ) and AD142 (*gerE36, \Delta cotE*) strains were incubated with lysozyme (50  $\mu$ g/ml) and plated on LB. Percentage of survival was calculated as number of colonies after treatment / number of colonies before treatment.

### **Figure S3. Analysis of protein synthesis during spore germination**

#### **Related to Figure 6**

(A) Spores of AR68 (*pupG-gfp*) were incubated with L-alanine and followed by time lapse microscopy. Shown are phase contrast (upper panels) and fluorescence (lower panels) images taken at the indicated time points. Images were scaled to the same intensity range. The intensity of a wild-type (PY79) strain, lacking the *gfp* gene, was subtracted from the net average fluorescence intensity. A representative experiment out of 3 independent biological repeats is shown. Scale bars represent 1  $\mu$ m.

(B) Signal from GFP fusion proteins (Figure 6C) was quantified by MetaMorph software (version 7.7, Molecular Devices). Bands were marked and their integrated intensity was determined. For each band, the integrated intensity of a same sized background region was subtracted.

**Table S1. The proteomic timeline of spore revival****Related to Figure 2**

The proteomic timeline of reviving LS5 ( $\Delta metE$ ) spores as determined by BONCAT is provided as a separate Excel file. The analysis is based on 3 independent biological repeats. Only proteins detected in all repeats are displayed.

**Table S2. Proteins synthesized during spore revival in the present of transcription inhibitors****Related to Figure 2**

| <b>Protein</b> | <b>Function</b>                           |
|----------------|-------------------------------------------|
| PdhA           | Pyruvate dehydrogenase (E1 alpha subunit) |
| PdhB           | Pyruvate dehydrogenase (E2 beta subunit)  |
| PdhD           | Dihydrolipoamide dehydrogenase            |
| RplU           | 50S ribosomal protein L21                 |
| RplP           | 50S ribosomal protein L16                 |
| RplT           | 50S ribosomal protein L20                 |
| YaaH           | Spore peptidoglycan hydrolase             |
| GlnA           | Glutamine synthetase                      |
| TpiA           | Triose phosphate isomerase                |
| YqjE           | Putative deacylase                        |
| YqhR           | Putative integral inner membrane protein  |
| YfnH           | Sugar-phosphate cytidyltransferase        |

Spores of LS5 ( $\Delta metE$ ) strain were incubated in reviving medium, in which methionine was replaced by AHA and supplemented with rifampicin (50  $\mu\text{g/ml}$ ) and actinomycin D (50  $\mu\text{g/ml}$ ). Samples were collected after 30 minutes, and processed as described in Figure 1A.

**Table S3. Lincomycin treatment inhibits spore germination****Related to Figure 4**

| <b>Treatment</b>                       | <b>% of non germinated spores</b> |
|----------------------------------------|-----------------------------------|
| Ethanol                                | 0.08% $\pm$ 0.03%                 |
| Lincomycin in Ethanol                  | 84.5% $\pm$ 2.1%                  |
| Tetracycline in Ethanol                | 91.3% $\pm$ 2.4%                  |
| Lincomycin and Tetracycline in Ethanol | 99.4% $\pm$ 0.4%                  |
| Lincomycin in DDW                      | 0.14% $\pm$ 0.05%                 |
| Tetracycline in DDW                    | 0.11% $\pm$ 0.04%                 |

Spores of PY79 (wild type) were incubated at 37°C for 2 hrs in ethanol with or without lincomycin and/or tetracycline (250  $\mu$ g/ml). Next, spores were washed with phosphate buffer and incubated with L-alanine for 30 minutes to trigger germination. Samples were analyzed by phase contrast microscopy to determine germination efficiency. Summarized in this table are the averaged percentages of non germinated spores from 4 independent experiments. For each experiment, three phase contrast fields were analyzed and the number of phase-bright and phase-dark spores was determined using manual counting procedure in MetaMorph 7.7 software.

**Table S4. Heat resistance of germinating spores****Related to Figure 4 and Figure 5**

| Strain | Genotype                  | Treatment prior to germination | % of heat resistant spores |
|--------|---------------------------|--------------------------------|----------------------------|
| PY79   | Wild type                 | -                              | 3.45% ± 1.1%               |
| LS26   | $\Delta rpmE$             | -                              | 4.7% ± 1.5%                |
| LS38   | $\Delta tig$              | -                              | 5.1% ± 1.8%                |
| LS78   | $\Delta rpmE, \Delta tig$ | -                              | 5.3% ± 2.0%                |
| PY79   | Wild type                 | Ethanol                        | 3.1% ± 1.2%                |
| PY79   | Wild type                 | Lincomycin-ethanol             | 4.9% ± 2.1%                |
| PY79   | Wild type                 | Tetracycline-ethanol           | 3.9% ± 1.7%                |

Spores of LS26 ( $\Delta rpmE$ ), LS38 ( $\Delta tig$ ), LS78 ( $\Delta tig, \Delta rpmE$ ) and PY79 (WT) not treated or treated with ethanol with or without lincomycin (250  $\mu\text{g/ml}$ ) or tetracycline (250  $\mu\text{g/ml}$ ) were incubated with L-alanine for 10 minutes and the number of viable cells was determined. The spores were then incubated at 80°C for 30 minutes and plated on LB. Percentage of heat resistant spores was calculated as number of colonies after heat treatment / number of colonies before heat treatment.

**Table S5. The spore germination proteome****Related to Figure 4**

The proteome of germinating LS5 ( $\Delta metE$ ) spores incubated with L-alanine, AGFK or Ca-DPA, as determined by BONCAT, is provided as a separate Excel file. The analysis is based on 3 independent biological repeats. Only proteins detected in all repeats are displayed.

**Table S6. Processes awakening during germination****Related to Figure 4**

| <b>Process</b>                             | <b>Ca-DPA</b> | <b>L-ala</b> | <b>AGFK</b> | <b>30 min</b> |
|--------------------------------------------|---------------|--------------|-------------|---------------|
| Glycolysis                                 | 9             | 9            | 9           | 13            |
| Pyruvate dehydrogenase complex             | 4             | 4            | 4           | 4             |
| Translation elongation factors             | 3             | 3            | 3           | 3             |
| Utilization of malate                      | 1             | 2            | 4           | 4             |
| Chaperones                                 | 4             | 5            | 6           | 8             |
| Ribosomal subunits                         | 3             | 3            | 19          | 47            |
| Electron transport                         | 0             | 1            | 6           | 6             |
| Oxidative and electrophile stress response | 1             | 2            | 3           | 3             |
| Transition state regulators                | 0             | 1            | 2           | 2             |
| RNases                                     | 1             | 1            | 5           | 5             |
| Ribosome assembly                          | 0             | 0            | 2           | 2             |
| Purine biosynthesis                        | 0             | 0            | 7           | 15            |
| Transcription machinery                    | 0             | 0            | 4           | 4             |
| Pentose phosphate pathway                  | 1             | 0            | 3           | 4             |
| TCA cycle                                  | 0             | 0            | 2           | 4             |
| tRNA Synthetases                           | 0             | 0            | 14          | 17            |
| ATP synthase                               | 0             | 0            | 2           | 9             |
| Proteolysis                                | 0             | 0            | 6           | 10            |
| Overflow metabolism                        | 0             | 0            | 2           | 3             |
| Diglycosyl-diacylglycerol biosynthesis     | 0             | 0            | 2           | 2             |
| Utilization of peptides                    | 0             | 0            | 3           | 5             |
| Purine salvage and interconversion         | 0             | 0            | 4           | 4             |
| Nucleotide metabolism                      | 0             | 0            | 1           | 1             |
| Unknown                                    | 0             | 1            | 2           | 5             |
| Phosphate metabolism                       | 0             | 0            | 1           | 1             |
| Cofactor biosynthesis                      | 0             | 0            | 0           | 12            |
| Utilization of amino acids                 | 0             | 0            | 0           | 6             |
| Utilization of ribose                      | 0             | 0            | 0           | 3             |



|                                           |           |           |            |            |
|-------------------------------------------|-----------|-----------|------------|------------|
| Biosynthesis of amino acids               | 0         | 0         | 0          | 5          |
| General stress proteins                   | 0         | 0         | 0          | 3          |
| Acquisition of iron                       | 0         | 0         | 0          | 2          |
| rRNA and tRNA modification and maturation | 0         | 0         | 0          | 3          |
| Pyrimidine biosynthesis                   | 0         | 0         | 0          | 2          |
| <b>Total</b>                              | <b>27</b> | <b>32</b> | <b>116</b> | <b>217</b> |

A table comparing the number of newly synthesized proteins for each indicated cellular process, as identified by mass spectrometry (data extracted from Table S1 and Table S5), when LS5 ( $\Delta metE$ ) spores were germinated with Ca-DPA, L-alanine or AGFK, or incubated in revival medium (30 min).

**Table S7. *B. subtilis* strains used in this study**

| Strain | Genotype                                                                           | Comments                                                                                                                                                                                                                                                                                                                                                                       |
|--------|------------------------------------------------------------------------------------|--------------------------------------------------------------------------------------------------------------------------------------------------------------------------------------------------------------------------------------------------------------------------------------------------------------------------------------------------------------------------------|
| PY79   | Wild type                                                                          | (Youngman et al., 1984)                                                                                                                                                                                                                                                                                                                                                        |
| LS5    | <i>metE::mls</i>                                                                   | The ORF of <i>metE</i> was replaced by <i>mls</i> gene using a long-flanking-homology PCR with primers 881-884                                                                                                                                                                                                                                                                 |
| LS26   | <i>rpmE::kan</i>                                                                   | The ORF of <i>rpmE</i> was replaced by <i>kan</i> gene using a long-flanking-homology PCR with primers 2526-2529                                                                                                                                                                                                                                                               |
| LS38   | <i>tig::kan</i>                                                                    | The ORF of <i>tig</i> was replaced by <i>kan</i> gene using a long-flanking-homology PCR with primers 2530-2533                                                                                                                                                                                                                                                                |
| LS47   | <i>atpA-gfp-cat</i>                                                                | PY79 was transformed with genomic DNA of strain BS23 (Johnson et al., 2004)                                                                                                                                                                                                                                                                                                    |
| LS50   | <i>tig-gfp-spc</i>                                                                 | PY79 was transformed with pLS50 ( <i>tig-gfp-spc</i> )                                                                                                                                                                                                                                                                                                                         |
| LS78   | <i>tig::kan</i> ,<br><i>rpmE::spc</i>                                              | The ORF of <i>rpmE</i> in LS38 was replaced by <i>spc</i> gene using a long-flanking-homology PCR with primers 2526, 2529, 2536 and 2537                                                                                                                                                                                                                                       |
| AR68   | <i>pupG-gfp-spc</i>                                                                | PY79 was transformed with pAR68 ( <i>pupG-gfp-spc</i> )                                                                                                                                                                                                                                                                                                                        |
| AR71   | <i>malS-gfp-spc</i>                                                                | PY79 was transformed with pAR71 ( <i>malS-gfp-spc</i> )                                                                                                                                                                                                                                                                                                                        |
| LS80   | <i>tig::kan</i> ,<br><i>malS-gfp-spc</i>                                           | LS38 was transformed with genomic DNA of strain AR71                                                                                                                                                                                                                                                                                                                           |
| LS81   | <i>rpmE::kan</i> ,<br><i>malS-gfp-spc</i>                                          | LS26 was transformed with genomic DNA of strain AR71                                                                                                                                                                                                                                                                                                                           |
| LS82   | <i>tig::kan</i> ,<br><i>metE::mls</i>                                              | LS38 was transformed with genomic DNA of strain LS5                                                                                                                                                                                                                                                                                                                            |
| LS83   | <i>rpmE::kan</i> ,<br><i>metE::mls</i>                                             | LS26 was transformed with genomic DNA of strain LS5                                                                                                                                                                                                                                                                                                                            |
| LS86   | <i>maeA::spc</i> ,<br><i>malS::kan</i> ,<br><i>mleA::tet</i> ,<br><i>ytsJ::mls</i> | Sequentially, the ORF of <i>maeA</i> was replaced by <i>spc</i> gene, the ORF of <i>malS</i> was replaced by <i>kan</i> gene, the ORF of <i>mleA</i> was replaced by <i>tet</i> gene, and finally the ORF of <i>ytsJ</i> was replaced by <i>mls</i> gene. All by using a long-flanking-homology PCR using primers, 2538-2541, 2542-2545, 2546-2549 and 2550-2553, respectively |
| LS100  | <i>rpmE::kan</i> ,<br><i>amyE::rpmE-cat</i>                                        | LS26 was transformed with pLS100 ( <i>amyE::rpmE-spc</i> )                                                                                                                                                                                                                                                                                                                     |
| LS101  | <i>tig::kan</i> ,<br><i>amyE::tig-cat</i>                                          | LS38 was transformed with pLS100 ( <i>amyE::tig-spc</i> )                                                                                                                                                                                                                                                                                                                      |
| IB66   | <i>dnaX-gfp-spc</i>                                                                | (Lemon and Grossman, 1998)                                                                                                                                                                                                                                                                                                                                                     |

|       |                                  |                                                                                                                   |
|-------|----------------------------------|-------------------------------------------------------------------------------------------------------------------|
| SB127 | <i>ezrA-gfp-spc</i>              | (Ben-Yehuda and Losick, 2002)                                                                                     |
| SB170 | <i>ftsZ-gfp-kan, amyE::ftsAZ</i> | Laboratory stock                                                                                                  |
| ME141 | <i>tagO-gfp-spc</i>              | (Elbaz and Ben-Yehuda, 2010)                                                                                      |
| RU97  | <i>gerAA::spc</i>                | The ORF of <i>gerAA</i> was replaced by <i>spc</i> gene using a long-flanking-homology PCR with primers 2656-2659 |
| AD17  | <i>gerE36</i>                    | A gift from Adam Driks (Loyola University Chicago)                                                                |
| AD28  | <i>cotE::cat</i>                 | (Driks et al., 1994)                                                                                              |
| AD142 | <i>gerE36, cotE::cat</i>         | A gift from Adam Driks (Loyola University Chicago)                                                                |

Long-flanking-homology PCR replacement strategy was based on (Guerout-Fleury et al., 1995) and the resultant PCR product was used to transform PY79. For some of the constructs, Gibson Assembly kit (New England Biolabs) was utilized to assemble the PCR products.

## **Supplemental Experimental Procedures**

### **Light microscopy**

Light microscopy was carried out as described previously (Segev et al., 2012). Briefly, bacterial cells (0.2 ml) were centrifuged and resuspended in 50 $\mu$ l of PBS x 1. Specimens were placed on 1% agarose pads, and visualized using an Axioplan 2 microscope (Zeiss) equipped with a CoolSnap HQ camera (Photometrics, Roper Scientific). For time-lapse revival experiments, spores were placed on 1% agarose pads made of the indicated medium, and incubated in a temperature controlled chamber (Pecon-Zeiss) at 37°C. For GFP measurements, the intensity of a wild-type (PY79) strain, lacking the *gfp* gene, was subtracted from the net average fluorescence intensity. Samples were photographed using Axio Observer Z1 (Zeiss), equipped with CoolSnap HQII camera (Photometrics, Roper Scientific). System control and image processing were performed using MetaMorph 7.7 software (Molecular Devices).

### **Spores purification**

For BONCAT experiments, spores were purified by water washing as described by Nicholson and Setlow (Harwood and Cutting, 1990). In brief, 400 ml of 48 hrs DSM culture was centrifuged and washed 3 times in 100 ml of DDW. The pellet was resuspended in 80 ml of DDW and kept in 4°C with constant agitation. On subsequent days the suspension was centrifuged once and resuspended in DDW (3 washes a day). Eventually, after 7 days, the pellet contained spores surrounded by a brown layer of cell debris. This layer became very viscous and tight when swirled and therefore easy to remove. The remaining pellet included almost exclusively free spores, as evaluated by phase contrast microscopy.

For microscopy and absorbance read experiments, spores were purified using 3 steps Histodenz gradient. Briefly, a 10 ml 24 hrs DSM culture was washed in DDW and resuspended in 1 ml of 20% Histodenz solution for 30 minutes on ice. Spores were then placed on top of a two step gradient made up from 2 ml 40% histodenz on top of 6 ml 50% histodenz. After centrifugation (90 min, 10,000 RPM, 23°C), a pellet was detected at the bottom of the tube. The pellet contains >99 % pure spore population, as evaluated by phase contrast microscopy.

### **L-malate determination**

L-malate was determined by using an enzymatic method with L-malate dehydrogenase (MDH) as described before (Peleg et al., 1990). Briefly, lyophilized spores and vegetative cells in an equal dry weight (4 mg) were lysed using Fastprep (MP) (6.5, 60 seconds, x3), and extracts were subjected to analysis in reaction mixture containing: hydrazine-glycine buffer (hydrazine, 0.4 M glycine, 0.5 M, pH 9), 2.55 mM NAD<sup>+</sup>, 10 U of L-malate dehydrogenase (cytoplasmic enzyme from porcine heart; Sigma). The reaction mixtures were incubated for 30 min at 37°C, and the reaction was stopped by boiling samples for 2 min. L-Malic acid was determined by following the formation of NADH at 340 nm. Reactions containing L-malic acid varying in concentration from 24 to 189 µM were used to generate standard curve.

### **DPA measurements**

DPA was assayed by the colorimetric method of (Janssen et al., 1958). Briefly, samples were taken during spore germination, centrifuged, and 4 ml of supernatant fluid was added to 1 ml freshly prepared solution [1% Fe (NH<sub>4</sub>)<sub>2</sub> (SO<sub>4</sub>)<sub>2</sub> x 6H<sub>2</sub>O, 1% ascorbic acid in 0.5 M acetate buffer, pH 5.5]. The color developed immediately, and OD<sub>440</sub> was measured.

### **Determination of the levels of spore germination proteins**

Levels of germinant receptor subunits (GerAA, GerAC, GerBC and GerKA) and SpoVAD were determined based on (Ramirez-Peralta et al., 2012) by Western blot analyses using rabbit antibodies against these proteins and a secondary antibody. Briefly, 125 ODs of spores were incubated at 70°C for 2 hrs in decoating buffer (0.1 M DTT, 0.1 M NaCl, 0.1 M NaOH, 1% SDS) followed by extensive water washes. Samples were treated with 1 mg lysozyme in 0.5 ml TEP buffer (50mM Tris-HCl pH 7.4, 5 mM EDTA) containing 1 mM PMSF, 1µg RNase, 1 µg Dnase I, and 20 µg of MgCl<sub>2</sub> at 37°C for 5 min, and then incubated on ice for 20 min. Spores were disrupted using Fastprep (MP) (6.5, 60 seconds, x3), and 100 µL of the lysate was added to 100 µl Laemmli sample buffer containing 55 mM DTT (425 µL BioRad 161-0737 plus 25 µL 1 M DTT) and incubated at 23°C for one hour. Western blot analysis was carried out as described by Ramirez-Peralta et al. (2012).

### **Determination of the levels of spore germination proteins**

Levels of germinant receptor subunits (GerAA, GerAC, GerBC and GerKA) and SpoVAD in the inner membrane fraction of spores were determined by Western blot analyses using rabbit antibodies against these proteins and a secondary antibody as described previously (Ramirez-Peralta et al., 2012).

### **Western blot analysis of GFP fusion proteins**

Proteins were extracted from dormant and germinating spores as described for BONCAT spore revival experiments. Extracts were incubated at 100°C for 10 min with Laemmli sample buffer. Proteins were separated by SDS-PAGE 12.5% and electroblotted onto a polyvinylidene difluoride (PVDF) transfer membrane (Immobilon-P; Millipore). For Immunoblot analysis of GFP fusion proteins, membranes were blocked for 1 hr at room temperature (0.05% Tween-20, 5% skim milk in TBSx1). Blots were then incubated for 1 hr at room temperature with polyclonal rabbit anti-GFP antibodies (1:10,000 in 0.05% Tween-20, 5% skim milk in TBSx1). Next, membranes were incubated for 1 hour at room temperature with peroxidase conjugated goat anti-rabbit secondary antibody (Bio-Rad) (1:10,000 in 0.05% Tween-20, 5% skim milk in). EZ-ECL kit (Biological Industries, Beit Haemek, Israel) was used for final detection.

### **Spore resistance to lysozyme treatment**

Spores were harvested from 5 ml DSM culture grown for 24 hrs and washed three times with cold water. The pelleted spores were resuspended in 1 ml of 0.05 M Tris-Cl buffer, pH 7.5, and the number of viable cells was determined. The spores were then incubated at 37°C for 60 min with lysozyme (50 µg/ml), and samples were plated to determine the number of survivors.

### **Plasmid construction**

**pLS50** (*tig-gfp-spc*), containing the 3' region of *tig* fused to *gfp*, was constructed by amplifying the 3' region of *tig* gene by PCR using primers 2534 and 2535, which replaced the stop codon with a *XhoI* site. The PCR-amplified DNA was digested with *EcoRI* and *XhoI* and was cloned into the *EcoRI* and *XhoI* sites of pKL147 (*spc*) (Lemon and Grossman, 1998), which contains the *gfp* coding sequence.

**pAR68** (*pupG-gfp-spc*), containing the 3' region of *pupG* fused to *gfp*, was constructed by amplifying the 3' region of *pupG* gene by PCR using primers 1929 and 1930, which replaced the stop codon with a *XhoI* site. The PCR-amplified DNA was digested with *MfeI* and *XhoI* and was cloned into the *EcoRI* and *XhoI* sites of pKL147 (*spc*) (Lemon and Grossman, 1998), containing the *gfp* coding sequence.

**pAR71** (*mals-gfp-spc*), containing the 3' region of *mals* fused to *gfp*, was constructed by amplifying the 3' region of *mals* gene by PCR using primers 1323 and 1324, which replaced the stop codon with a *XhoI* site. The PCR-amplified DNA was digested with *EcoRI* and *XhoI* and was cloned into the *EcoRI* and *XhoI* sites of pKL147 (*spc*) (Lemon and Grossman, 1998), containing the *gfp* coding sequence.

**pLS100** (*amyE::rpmE-cat*), containing the *rpmE* gene (promoter and ORF) with flanking *amyE* sequences and *cat* gene, was constructed by amplifying the *rpmE* gene by PCR using primers 2556 and 2557. The PCR-amplified DNA was digested with *BamHI* and *HindIII* and cloned into the *BamHI* and *HindIII* sites of pDG364 (*amyE::cat*) (Guerout-Fleury et al., 1996).

**pLS101** (*amyE::tig-cat*), containing the *tig* gene (promoter and ORF) with flanking *amyE* sequences and a *cat* gene, was constructed by amplifying the *tig* gene by PCR using primers 2554 and 2555. The PCR-amplified DNA was cloned into the *BamHI* and *HindIII* sites of pDG364 (*amyE::cat*) (Guerout-Fleury et al., 1996) using Gibson Assembly cloning kit (New England Biolabs).

### Primers used in this study

| Name | Target gene | Primer sequence                                                  |
|------|-------------|------------------------------------------------------------------|
| 881  | <i>metE</i> | 5'-CCTTGGAGGGCCAAGCGATGT-3'                                      |
| 882  | <i>metE</i> | 5'-ATTATGTCT TTTGCGCAG TCGGCCCG CGGATA<br>CAGGCTGCTAAGA-3'       |
| 883  | <i>metE</i> | 5'-CATTAATTT TGAGGGTTGCCAGCAGCCACAATC<br>GGTTTCTTATTTAGCA-3'     |
| 884  | <i>metE</i> | 5'-GAGCTTGTC AACGCCGCTCA-3'                                      |
| 2526 | <i>rpmE</i> | 5'-CCCGGCTCTTACGCCACTTTATC-3'                                    |
| 2527 | <i>rpmE</i> | 5'-ATCACCTCAAATGGTTCGCTGGGTTTTGTATCCATC<br>TCCTTCCGCCCTG -3'     |
| 2528 | <i>rpmE</i> | 5'-AAGTTC GCTAGATAGGGGTCCCGAGCTAATAGA<br>TTTCTCAACAGGCAAGCAG -3' |

|      |             |                                                                     |
|------|-------------|---------------------------------------------------------------------|
| 2529 | <i>rpmE</i> | 5'-GGCCTTCTTTCGTTTTTTTTATGTTATT-3'                                  |
| 2536 | <i>rpmE</i> | 5'-ACATGTATTCACGAACGAAAATCGATGTATCCATC<br>TCCTTCCGCCCTG -3'         |
| 2537 | <i>rpmE</i> | 5'-ATTTTAGAAAACAATAAACCCCTTGCATAATAGATT<br>TCTCAACAGGCAAGCAGCAG -3' |
| 2556 | <i>rpmE</i> | 5'-AAACCCGGATCCATTGTATTTGCAAAAGAAGTAAA<br>TCACTG-3'                 |
| 2557 | <i>rpmE</i> | 5'-TAGTTTAAGCTTTTACTTAAGACCGTATTTTTTGT<br>AAAGCG-3'                 |
| 2530 | <i>tig</i>  | 5'-AAAGAAGGTTATGGCCATTATTTTAC-3'                                    |
| 2531 | <i>tig</i>  | 5'-ATCACCTCAAATGGTTCGCTGGGTTTGTGTTCCCT<br>CCAAAATCTATTCA -3'        |
| 2532 | <i>tig</i>  | 5'-AAGTTCGCTAGATAGGGTCCCGAGCAATAGTACT<br>AATAAACAGGGCGCG-3'         |
| 2533 | <i>tig</i>  | 5'-GAATTCTTGATGAGGATGCTTACGT-3'                                     |
| 2534 | <i>tig</i>  | 5'-TGGATCGAATTCATGAATTCGCAAAAG-3'                                   |
| 2535 | <i>tig</i>  | 5'-TGGATCCTCGAGACGGTTTTCTACAAG-3'                                   |
| 2554 | <i>tig</i>  | 5'-AAACCCGGATCCATCGCGCCATATAGTTGAAAGCG<br>-3'                       |
| 2555 | <i>tig</i>  | 5'-AAACCCGGATCCTTAACGGTTTTCTACAAGAAAAT<br>CAATTGC-3'                |
| 1323 | <i>malS</i> | 5'-TGGACTGAATTCCCGCCAGTTGAATATAACGGAGT<br>TAC-3'                    |
| 1324 | <i>malS</i> | 5'-TGGACTCTCGAGTATCGCGCGAATCGGTTTGTATA<br>-3'                       |
| 1929 | <i>pupG</i> | 5'-TGGACTCAATTGGCCAGATTTCCAGATATGTCTTC<br>AGCC-3'                   |
| 1930 | <i>pupG</i> | 5'-TGGACTCTCGAGTTCGTACTIONGAGCGACGATCGCTT<br>TAAC-3'                |
| 2542 | <i>malS</i> | 5'- AGACAGACTCTGACAGGAGTCTG-3'                                      |
| 2543 | <i>malS</i> | 5'-ATCACCTCAAATGGTTCGCTGGGTTTCTGCCTCTT<br>CCTTTCTGAGCAT-3'          |
| 2544 | <i>malS</i> | 5'-AAGTTCGCTAGATAGGGTCCCGAGCTTGCTTGTC<br>CGGTGTTAAGAGGC-3'          |
| 2545 | <i>malS</i> | 5'-CTGTCCCGGTCTAATGCCGATTT-3'                                       |



|      |              |                                                                  |
|------|--------------|------------------------------------------------------------------|
| 2538 | <i>maeA</i>  | 5'- ATTCGCTTCTGCTGATGGTCGTG-3'                                   |
| 2539 | <i>maeA</i>  | 5'-ACATGTATTCACGAACGAAAATCGAGACCGATCAT<br>GATCTTTATGCGAC -3'     |
| 2540 | <i>maeA</i>  | 5'-ATTTTAGAAAACAATAAACCCCTTGCATTCTGTCCG<br>AGGGAAAGCTTTTTG -3'   |
| 2541 | <i>maeA</i>  | 5'- CAGAATCGCACTGACCACAAACG-3'                                   |
| 2546 | <i>mleA</i>  | 5'-GTTAGGCATTCCGCTTCCTCTAGTAG-3'                                 |
| 2547 | <i>mleA</i>  | 5'-GAACAACCTGCACCATTGCAAGATCAGTGATCCTC<br>CCCTATTAGCCTAG-3'      |
| 2548 | <i>mleA</i>  | 5'-TTGATCCTTTTTTTATAACAGGAATTCATGTAGCTA<br>AACAGCACCTGTCGTAGC-3' |
| 2549 | <i>mleA</i>  | 5'-CAGAATGACCAGCAGCACAAAGGCATA-3'                                |
| 2550 | <i>ytsJ</i>  | 5'-CGCGTGCCGTCAAAAAGCGTAAATC-3'                                  |
| 2551 | <i>ytsJ</i>  | 5'-ATTATGTCTTTTGGCGCAGTCGGCCGTATACTGCTGC<br>GTTGATTGCTGC-3'      |
| 2552 | <i>ytsJ</i>  | 5'-CATTAATTTTGGAGGGTTGCCAGGGCGCGCTGTTCT<br>CAAGTTAAACTG-3'       |
| 2553 | <i>ytsJ</i>  | 5'-CAGCGAAATTGTAATCGCCAAGGGA-3'                                  |
| 2656 | <i>gerAA</i> | 5'-TTCGAACGGTCCAGCATGTGAA-3'                                     |
| 2657 | <i>gerAA</i> | 5'-CTGAGCGAGGGAGCAGAATATGAAAGCGGAGGAT<br>ACGAAGTGGC-3'           |
| 2658 | <i>gerAA</i> | 5'-GTTGACCAGTGCTCCCTGCAAATACAATGCTTGGG<br>GCCGGACTT-3'           |
| 2659 | <i>gerAA</i> | 5'-CGTCATCCGGCCAGAGAGAAAAAT-3'                                   |

## Supplemental References

Ben-Yehuda, S., and Losick, R. (2002). Asymmetric cell division in *B. subtilis* involves a spiral-like intermediate of the cytokinetic protein FtsZ. *Cell* 109, 257-266.

Driks, A., Roels, S., Beall, B., Moran, C.P., Jr., and Losick, R. (1994). Subcellular localization of proteins involved in the assembly of the spore coat of *Bacillus subtilis*. *Genes Dev* 8, 234-244.

Elbaz, M., and Ben-Yehuda, S. (2010). The metabolic enzyme ManA reveals a link between cell wall integrity and chromosome morphology. *PLoS Genet* 6, e1001119.

Guerout-Fleury, A.M., Frandsen, N., and Stragier, P. (1996). Plasmids for ectopic integration in *Bacillus subtilis*. *Gene* 180, 57-61.

Guerout-Fleury, A.M., Shazand, K., Frandsen, N., and Stragier, P. (1995). Antibiotic-resistance cassettes for *Bacillus subtilis*. *Gene* 167, 335-336.

Janssen, F.W., Lund, A.J., and Anderson, L.E. (1958). Colorimetric assay for dipicolinic acid in bacterial spores. *Science* 127, 26-27.

Johnson, A.S., van Horck, S., and Lewis, P.J. (2004). Dynamic localization of membrane proteins in *Bacillus subtilis*. *Microbiology* 150, 2815-2824.

Lemon, K.P., and Grossman, A.D. (1998). Localization of bacterial DNA polymerase: evidence for a factory model of replication. *Science* 282, 1516-1519.

Peleg, Y., Rokem, J.S., Goldberg, I., and Pines, O. (1990). Inducible overexpression of the *FUM1* gene in *Saccharomyces cerevisiae*: localization of fumarase and efficient fumaric acid bioconversion to L-malic acid. *Appl Environ Microbiol* 56, 2777-2783.

Youngman, P., Perkins, J.B., and Losick, R. (1984). Construction of a cloning site near one end of Tn917 into which foreign DNA may be inserted without affecting transposition in *Bacillus subtilis* or expression of the transposon-borne *erm* gene. *Plasmid* 12, 1-9.
